# Supplementary material for: Flexible spacer-block multi-component copolymerized donors enable resilient organic solar cells with over 40% crack-onset strain
Source: Royal Society of Chemistry journal article supplement (doi:10.1039/d4ee04208e), 2024-01-01
Supplement: d4ee04208e1.pdf [file d4ee04208e1.pdf]

## Supplementary Information

### Flexible Spacer-block Multi-component Copolymerized Donors Enable Resilient Organic Solar Cells with over 40% Crack-onset Strain

*Congqi Lin<sup>abc†</sup>, Zhenyu Chen<sup>ab†</sup>, Ruixiang Peng<sup>ab\*</sup>, Wei Song<sup>ab\*</sup>, Jiangwei Gao<sup>ab</sup>, Xueliang Yu<sup>ab</sup>, Tingting Feng<sup>abc</sup>, Yongqi Bai<sup>ab</sup>, and Ziyi Ge<sup>ab\*</sup>*

<sup>a</sup> Zhejiang Engineering Research Center for Energy Optoelectronic Materials and Devices, Ningbo Institute of Materials Technology & Engineering, Chinese Academy of Sciences, Ningbo 315201, P. R. China

<sup>b</sup> Center of Materials Science and Optoelectronics Engineering, University of Chinese Academy of Sciences, Beijing 100049, P. R. China

<sup>c</sup> Faculty of Materials and Chemical Engineering, Ningbo University, Ningbo 315211, P. R. China.

†These authors contributed equally to this work.

\*Corresponding authors, E-mail: pengrx@nimte.ac.cn; songwei@nimte.ac.cn; geziyi@nimte.ac.cn.

## 1. Materials

The indium tin oxide (ITO) glass was purchased from Suzhou Shang yang Solar Technology Co., Ltd. BTP-eC9 was purchased from **Solarmer Energy Inc**, monomers (4, 8-bis (4-chloro-5-(2-ethylhexyl) thiophen-2-yl) benzo [1, 2-b: 4, 5-b'] dithiophene-2, 6-diyl) bis (trimethylstannane); 1, 3-bis (5-bromothiophen-2-yl)-5, 7-bis (2-ethylhexyl)-4H, 8H-benzo [1, 2-c: 4, 5-c'] dithiophene-4, 8-dione; 5, 8-bis(5-bromo-4-(2-butyloctyl) thiophen-2-yl) dithieno [3', 2': 3, 4; 2'', 3'': 5, 6] benzo [1, 2-c] [1, 2, 5] thiadiazole; (3-chlorothiophen-2-yl) trimethylstannane; and 1, 4-bis((5-(trimethylstannyl) thiophen-2-yl) thio) butane were purchased from **Nanjing Zhi yan Technology Co., Ltd.**

The PM6, BTP-eC9, D18, PY-IT, and PDINN were purchased from **Solarmer Materials Inc**. Toluene was purchased from **Zhengzhou Alfa Chemical Co., Ltd.**, chloroform was commercially available from **China National Medicines Corporation Ltd.** PEDOT: PSS (Clevios P VP 4083) was obtained from **J&K Chemicals Inc**. All reagents were directly used without any further treatment, meanwhile, all of reactions were carried out under a nitrogen atmosphere.

2. The synthetic route of MCD PM6-Cl<sub>n</sub>-r-D18-Cl<sub>1-n</sub>-TCl (PM6-Cl<sub>0.8</sub>-r-D18-Cl<sub>0.2</sub>-TCl (n=0.8)).

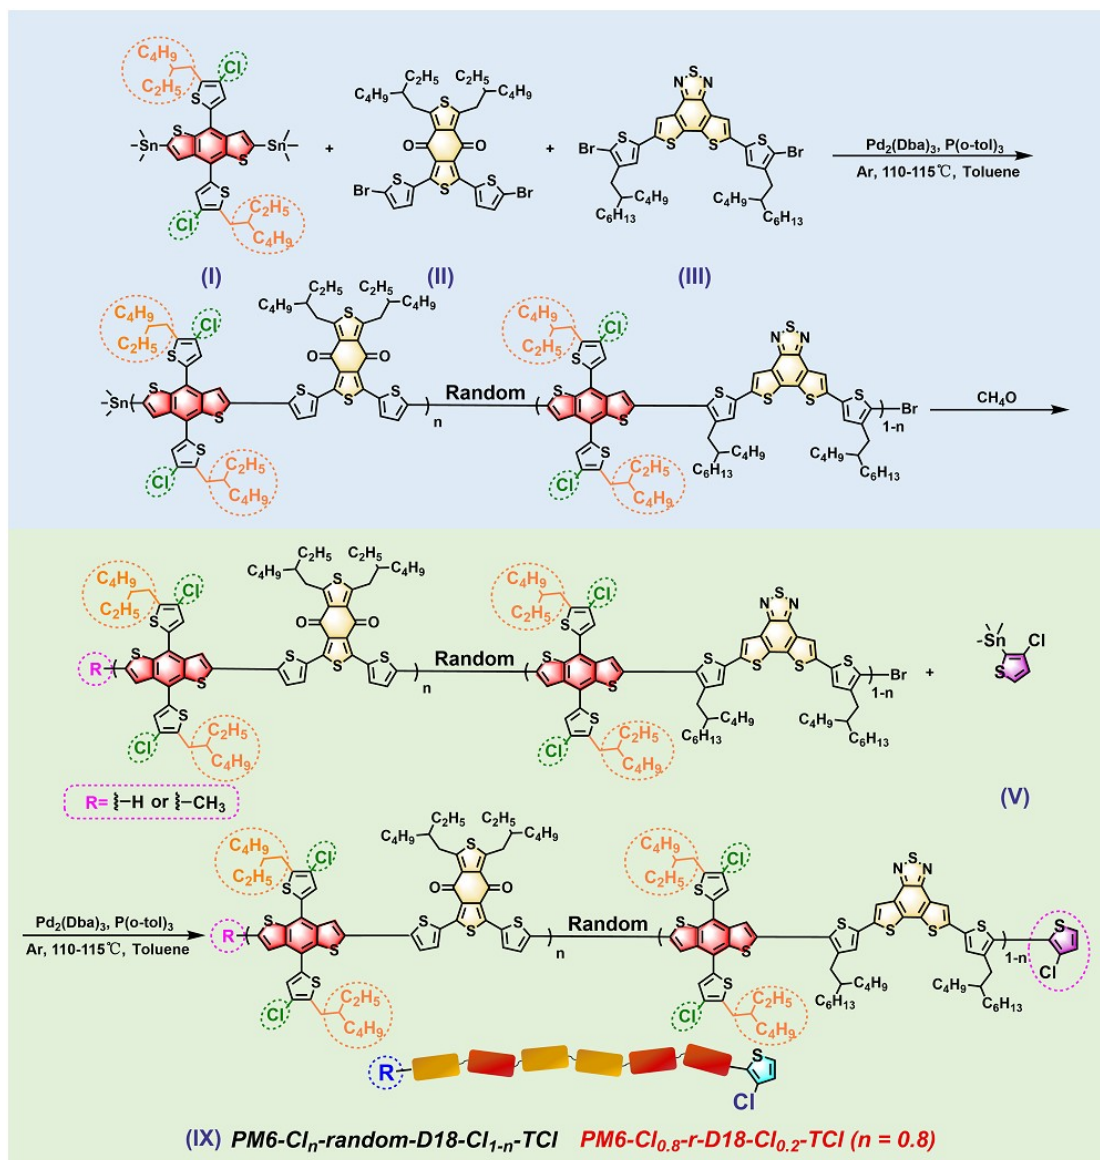

Figure S1. The synthetic route of random MCD PM6-Cl<sub>n</sub>-r-D18-Cl<sub>1-n</sub>-TCl.

2. The synthetic routes of MCDs  $\text{PM6-Cl}_n\text{-}b\text{-D18-Cl}_{1-n}\text{-TCl}$  ( $\text{PM6-Cl}_{0.8}\text{-}b\text{-D18-Cl}_{0.2}\text{-TCl}$  ( $n=0.8$ ),  $\text{PM6-Cl}_{0.5}\text{-}b\text{-D18-Cl}_{0.5}\text{-TCl}$  ( $n=0.5$ ), and  $\text{PM6-Cl}_{0.2}\text{-}b\text{-D18-Cl}_{0.8}\text{-TCl}$  ( $n=0.2$ )) as well as  $\text{PM6-Cl}_n\text{-}b\text{-D18-Cl}_{1-n}\text{-BTB}$  ( $\text{PM6-Cl}_{0.8}\text{-}b\text{-D18-Cl}_{0.2}\text{-BTB}$  ( $n=0.8$ )).

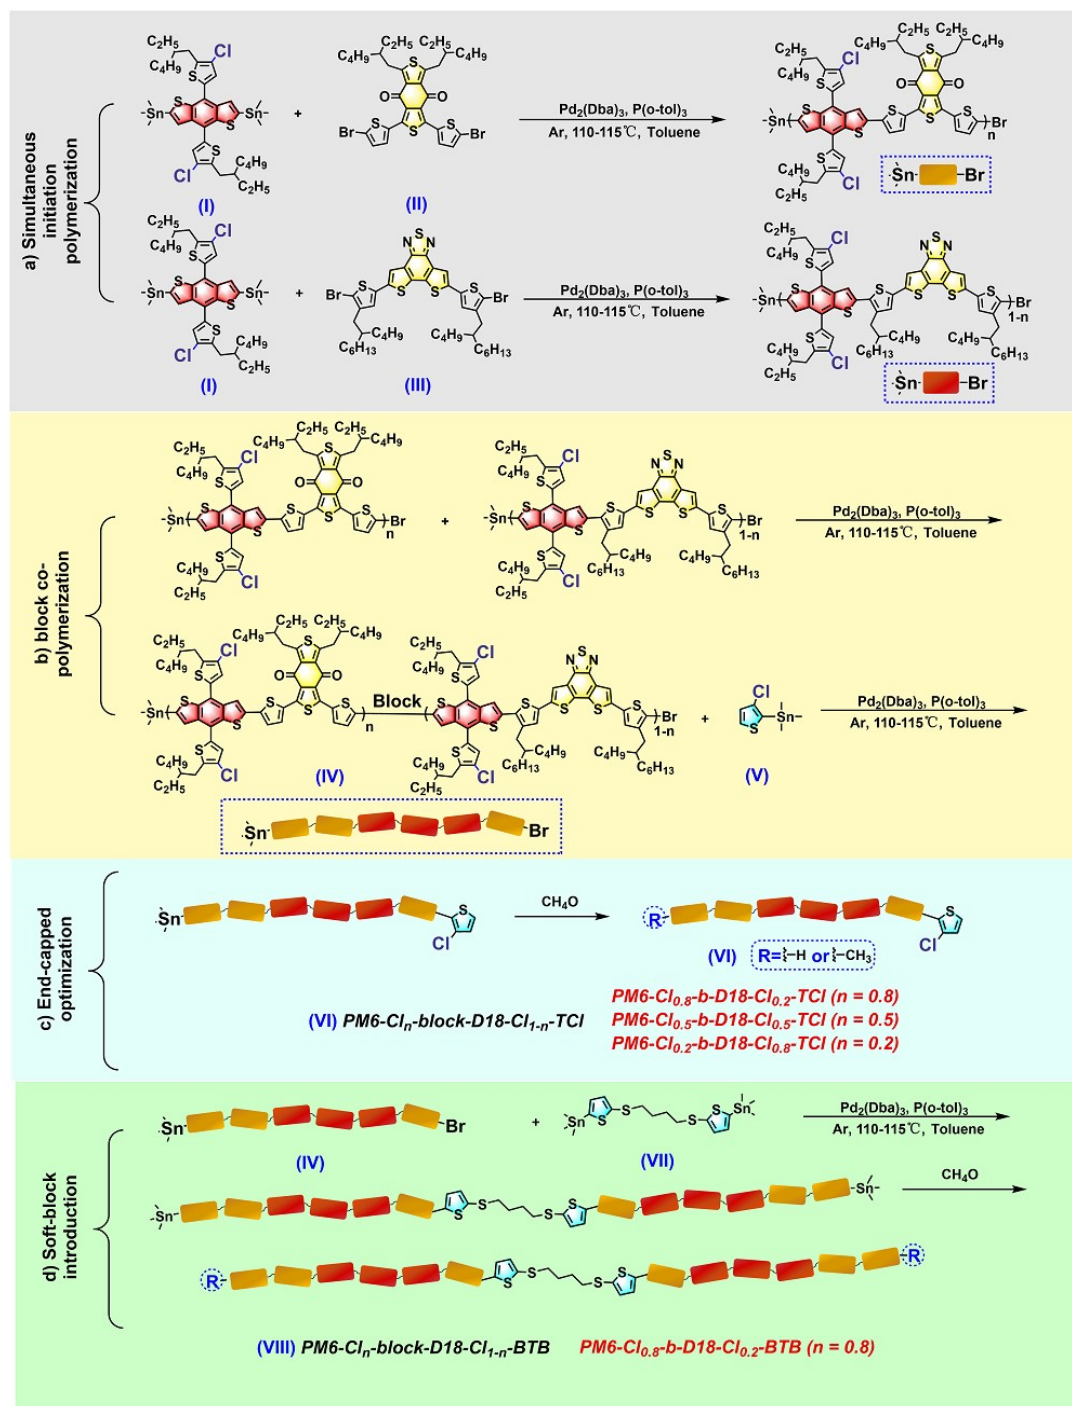

**Figure S2.** The synthetic route of *sequentially-block* MCD  $\text{PM6-Cl}_n\text{-}b\text{-D18-Cl}_{1-n}\text{-TCl}$  and *flexible-spacer block* MCD  $\text{PM6-Cl}_n\text{-}b\text{-D18-Cl}_{1-n}\text{-BTB}$ .

**Monomer (I):** (4, 8-bis (4-chloro-5-(2-ethylhexyl) thiophen-2-yl) benzo [1, 2-*b*: 4, 5-*b'*] dithiophene-2, 6-diyl) bis (trimethylstannane), molecular weight ( $M_w$ ): 973.45 g mol<sup>-1</sup>, <sup>1</sup>H NMR (400 MHz, CDCl<sub>3</sub>) δ 7.63 (s, 2H), 7.25 (s, 2H), 2.85 (dd,  $J=7.2, 3.4$  Hz, 4H), 1.76 (p,  $J=6.4$  Hz, 2H), 1.52–1.33 (m, 16H), 0.99–0.89 (m, 12H), 0.42 (s, 18H).

**Monomer (II):** 1, 3-bis (5-bromothiophen-2-yl)-5, 7-bis(2-ethylhexyl)-4H, 8H-benzo [1, 2-*c*: 4, 5-*c'*] dithiophene-4, 8-dione,  $M_w$ : 766.72 g mol<sup>-1</sup>, <sup>1</sup>H NMR (400 MHz, CDCl<sub>3</sub>) δ 7.44 (d,  $J=4.0$  Hz, 2H), 7.06 (d,  $J=4.0$  Hz, 2H), 3.30 (t,  $J=7.7$  Hz, 4H), 1.80–1.72 (m, 2H), 1.43–1.29 (m, 16H), 0.92 (q,  $J=7.6$  Hz, 12H).

**Monomer (III):** 5, 8-bis (5-bromo-4-(2-butyloctyl) thiophen-2-yl) dithieno [3', 2': 3, 4; 2'', 3'': 5, 6] benzo [1, 2-*c*] [1, 2, 5] thiadiazole,  $M_w$ : 907.02 g mol<sup>-1</sup>, <sup>1</sup>H NMR (400 MHz, CDCl<sub>3</sub>): δ=7.90 (s, 2H), 6.98 (s, 2H), 2.51 (d,  $J = 7.1$ , 4H), 1.71-1.99 (s, 2H), 1.39-1.26 (m, 32H), 0.95-0.85 (m, 12H).

**Compound (V):** (3-chlorothiophen-2-yl) trimethylstannane,  $M_w$ : 281.39 g mol<sup>-1</sup>, <sup>1</sup>H NMR (400 MHz, CDCl<sub>3</sub>) δ 7.16 (d,  $J=3.2$  Hz, 2H), 7.05 (d,  $J=3.3$  Hz, 2H), 2.79 (d,  $J=6.6$  Hz, 4H), 1.74 (t,  $J=3.4$  Hz, 4H), 0.36 (s, 18H).

**Compound (VII):** 1, 4-bis ((5-(trimethylstannyl) thiophen-2-yl) thio) butane,  $M_w$ : 612.10 g mol<sup>-1</sup>, <sup>1</sup>H NMR (400 MHz, CDCl<sub>3</sub>) δ 7.16 (d,  $J=3.2$  Hz, 2H), 7.05 (d,  $J=3.3$  Hz, 2H), 2.79 (d,  $J=6.6$  Hz, 4H), 1.74 (t,  $J=3.4$  Hz, 4H), 0.36 (s, 18H).

**Synthesis of random MCD (IX) PM6-Cl<sub>0.8-r</sub>-D18-Cl<sub>0.2</sub>-TCl:** **Monomer (I)** (100 mg, 0.1027 mmol), **monomer (II)** (63.01 mg, 0.08218 mmol), **monomer (III)** (18.64 mg, 0.02055 mmol), additive **Pd<sub>2</sub>(Dba)<sub>3</sub>** (10 mg, 0.0109 mmol) and additive **P(o-tol)<sub>3</sub>** (10 mg, 0.03285 mmol) were dissolved in **toluene** (1 ml) and stirred at 110°C for 10 h under nitrogen atmosphere. The solvent was removed under vacuum after the reaction mixture was cooled to ambient temperature and settled in methanol. Afterward, **PM6-Cl<sub>0.8-r</sub>-D18-Cl<sub>0.2</sub>-TCl** was purified through Soxhlet extraction, followed by acetone, methanol,

dichloromethane, chloroform, and chlorobenzene. Finally, the components in chlorobenzene were collected and settled in methanol. The components in chlorobenzene were finally collected and settled in methanol. After overnight drying in a vacuum drying oven, a brownish yellow target product (118.07 mg, 65% yield) was obtained.  $^1\text{H NMR}$  ( $\text{CDCl}_3$ ):  $\delta=7.52$  (br, aromatic protons), 7.00 (br, aromatic protons), 2.97 (br, aliphatic protons), 2.33 (br, aliphatic protons), 1.25-0.69 (br, aromatic protons).  $M_n$ : 76.7 kDa;  $M_w$ : 175.3 kDa;  $PDI$ : 2.29.

**Synthesis of sequentially-block MCD (VI) PM6-Cl<sub>0.8</sub>-b-D18-Cl<sub>0.2</sub>-TCl: Monomer (I)** (100 mg, 0.1027 mmol), **monomer (II)** (63.01 mg, 0.08218 mmol), **monomer (III)** (18.64 mg, 0.02055 mmol), additive **Pd<sub>2</sub>(Dba)<sub>3</sub>** (10 mg, 0.0109 mmol) and additive **P(o-tol)<sub>3</sub>** (10 mg, 0.03285 mmol) were dissolved in **toluene** (1 ml) and stirred at 110°C for 10 h under nitrogen atmosphere. Until the first step of polymerization is completed, further adding **compound (V)** (34.68 mg, 0.1232 mmol) and continue for 12 h. The solvent was removed under vacuum after the reaction mixture was cooled to ambient temperature and settled in methanol. Afterward, **PM6-Cl<sub>0.8</sub>-b-D18-Cl<sub>0.2</sub>-TCl** were purified through Soxhlet extraction, followed by acetone, methanol, dichloromethane, chloroform, and chlorobenzene. Finally, the components in chlorobenzene were collected and settled in methanol. After overnight drying in a vacuum drying oven, a brownish yellow target product (144.94 mg, 67% yield) was obtained.  $^1\text{H NMR}$  ( $\text{CDCl}_3$ ):  $\delta=7.52$  (br, aromatic protons), 7.00 (br, aromatic protons), 2.98 (br, aliphatic protons), 2.31 (br, aliphatic protons), 1.26-0.70 (br, aromatic protons).  $M_n$ : 100.4 kDa;  $M_w$ : 171.9 kDa;  $PDI$ : 1.71.

**Synthesis of sequentially-block MCD (VI) PM6-Cl<sub>0.5</sub>-b-D18-Cl<sub>0.5</sub>-TCl: Monomer (I)** (100 mg, 0.1027 mmol), **monomer (II)** (39.38 mg, 0.05136 mmol), **monomer (III)** (46.59 mg, 0.05136 mmol), additive **Pd<sub>2</sub>(Dba)<sub>3</sub>** (10 mg, 0.0109 mmol) and additive **P(o-tol)<sub>3</sub>** (10 mg, 0.03285 mmol) were dissolved in **toluene** (1 ml) and stirred at 110°C for 10 h under nitrogen atmosphere. Until the first step of polymerization is completed, further adding **compound (V)** (34.68 mg, 0.1232 mmol) and continue for 12 h. The

solvent was removed under vacuum after the reaction mixture was cooled to ambient temperature and settled in methanol. Afterward, **PM6-Cl<sub>0.5</sub>-*b*-D18-Cl<sub>0.5</sub>-TCl** were purified through Soxhlet extraction, followed by acetone, methanol, dichloromethane, chloroform, and chlorobenzene. Finally, the components in chlorobenzene were collected and settled in methanol. After overnight drying in a vacuum drying oven, a brownish yellow target product (139.00 mg, 63% yield) was obtained. <sup>1</sup>H NMR (CDCl<sub>3</sub>): δ=7.52 (br, aromatic protons), 7.00 (br, aromatic protons), 3.01 (br, aliphatic protons), 2.33 (br, aliphatic protons), 1.26-0.65 (br, aromatic protons). *M<sub>n</sub>*: 87.9 kDa; *M<sub>w</sub>*: 165.4 kDa; *PDI*: 1.92.

**Synthesis of sequentially-block MCD (VI) PM6-Cl<sub>0.2</sub>-*b*-D18-Cl<sub>0.8</sub>-TCl: Monomer (I)** (100 mg, 0.1027 mmol), **monomer (II)** (15.75 mg, 0.02054 mmol), **monomer (III)** (74.54 mg, 0.08218 mmol), additive **Pd<sub>2</sub>(Dba)<sub>3</sub>** (10 mg, 0.0109 mmol) and additive **P(o-tol)<sub>3</sub>** (10 mg, 0.03285 mmol) were dissolved in **toluene** (1 ml) and stirred at 110°C for 10 h under nitrogen atmosphere. Until the first step of polymerization is completed, further adding **compound (V)** (34.68 mg, 0.1232 mmol) and continue for 12 h. The solvent was removed under vacuum after the reaction mixture was cooled to ambient temperature and settled in methanol. Afterward, **PM6-Cl<sub>0.2</sub>-*b*-D18-Cl<sub>0.8</sub>-TCl** were purified through Soxhlet extraction, followed by acetone, methanol, dichloromethane, chloroform, and chlorobenzene. Finally, the components in chlorobenzene were collected and settled in methanol. After overnight drying in a vacuum drying oven, a brownish yellow target product (134.98 mg, 60% yield) was obtained. <sup>1</sup>H NMR (CDCl<sub>3</sub>): δ=7.52 (br, aromatic protons), 7.00 (br, aromatic protons), 3.00 (br, aliphatic protons), 2.38 (br, aliphatic protons), 1.26-0.66 (br, aromatic protons). *M<sub>n</sub>*: 65.1 kDa; *M<sub>w</sub>*: 154.9 kDa; *PDI*: 2.38.

**Synthesis of flexible-spacer block MCD (VIII) PM6-Cl<sub>0.8</sub>-*b*-D18-Cl<sub>0.2</sub>-BTB: Monomer (I)** (100 mg, 0.1027 mmol), **monomer (II)** (63.01 mg, 0.08218 mmol), **monomer (III)** (18.64 mg, 0.02055 mmol), additive **Pd<sub>2</sub>(Dba)<sub>3</sub>** (10 mg, 0.0109 mmol)

and additive **P(o-tol)<sub>3</sub>** (10 mg, 0.03285 mmol) were dissolved in **toluene** (1 ml) and stirred at 110°C for 10 h under nitrogen atmosphere. Until the first step of polymerization is completed, further adding **compound (VII)** (75.46 mg, 0.1232 mmol) and continue for 12 h. The solvent was removed under vacuum after the reaction mixture was cooled to ambient temperature and settled in methanol. Afterward, **PM6-Cl<sub>0.8-b-D18-Cl<sub>0.2</sub>-BTB</sub>** were purified through Soxhlet extraction, followed by acetone, methanol, dichloromethane, chloroform, and chlorobenzene. Finally, the components in chlorobenzene were collected and settled in methanol. After overnight drying in a vacuum drying oven, a brownish yellow target product (151.69 mg, 59% yield) was obtained. <sup>1</sup>H NMR (CDCl<sub>3</sub>): δ=7.52 (br, aromatic protons), 7.00 (br, aromatic protons), 2.98 (br, aliphatic protons), 1.26-0.63 (br, aromatic protons). *M<sub>n</sub>*: 93.4 kDa; *M<sub>w</sub>*: 174.0 kDa; *PDI*: 1.86.

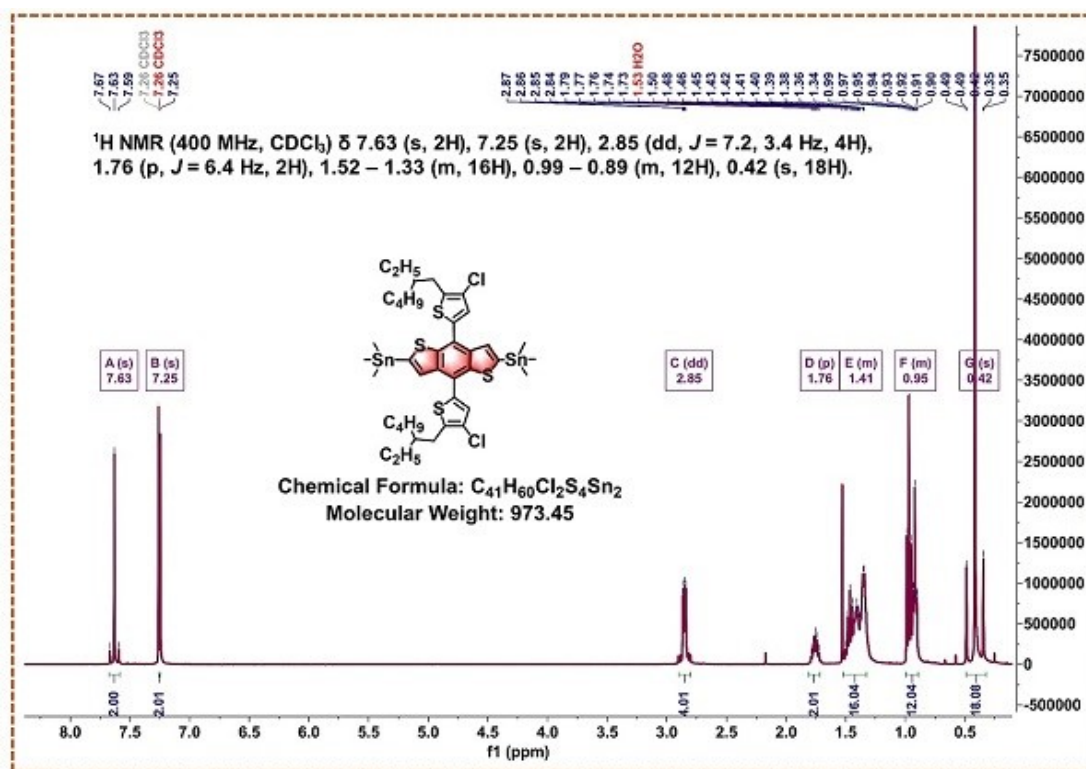

**Figure S3.** <sup>1</sup>H-NMR spectrum of **monomer (I)** in chloroform-*d*.



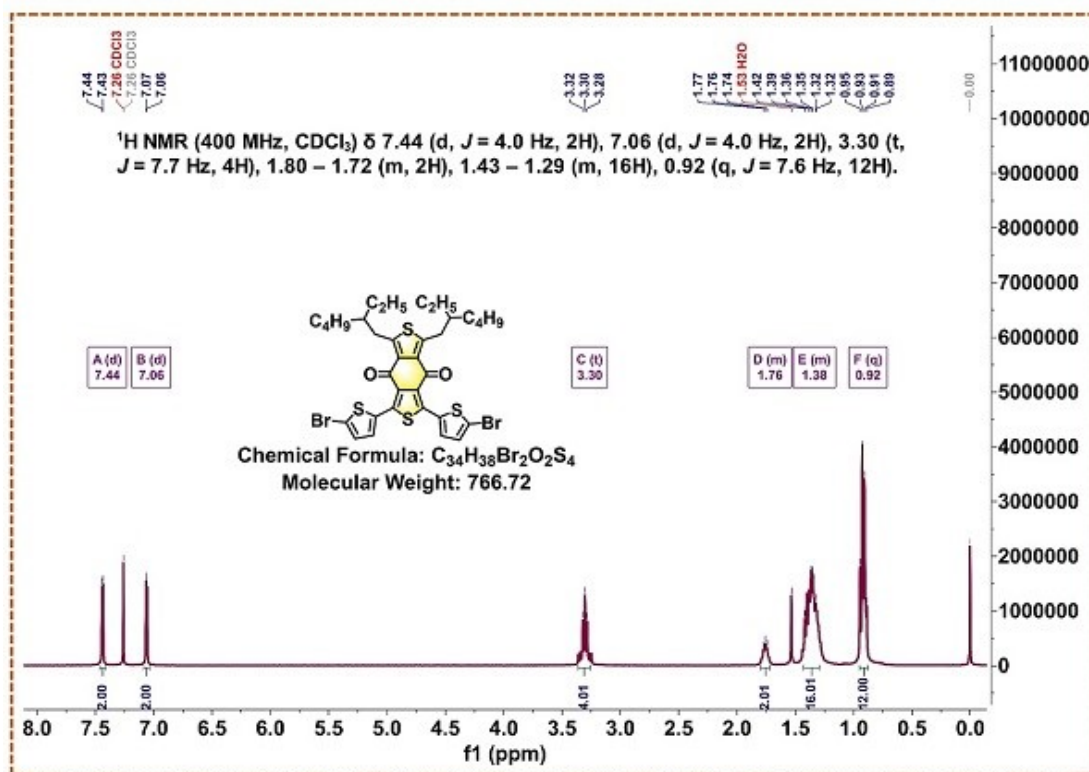

Figure S4. <sup>1</sup>H-NMR spectrum of monomer (II) in chloroform-*d*.

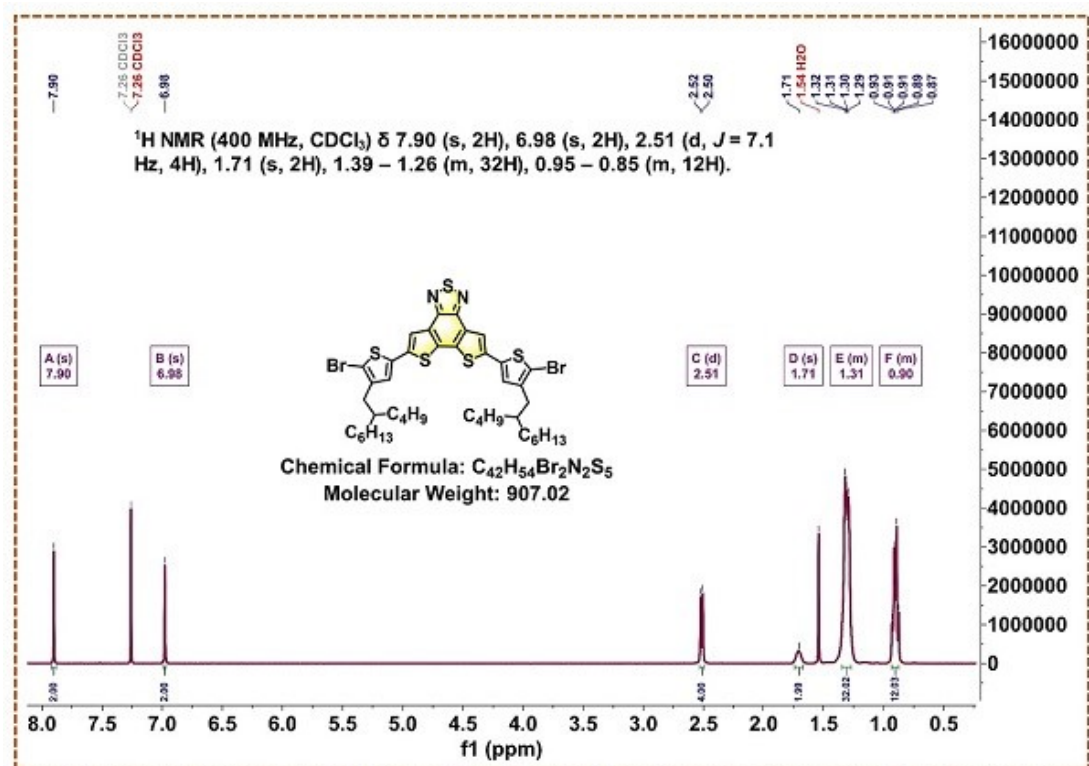

Figure S5. <sup>1</sup>H-NMR spectrum of monomer (III) in chloroform-*d*.

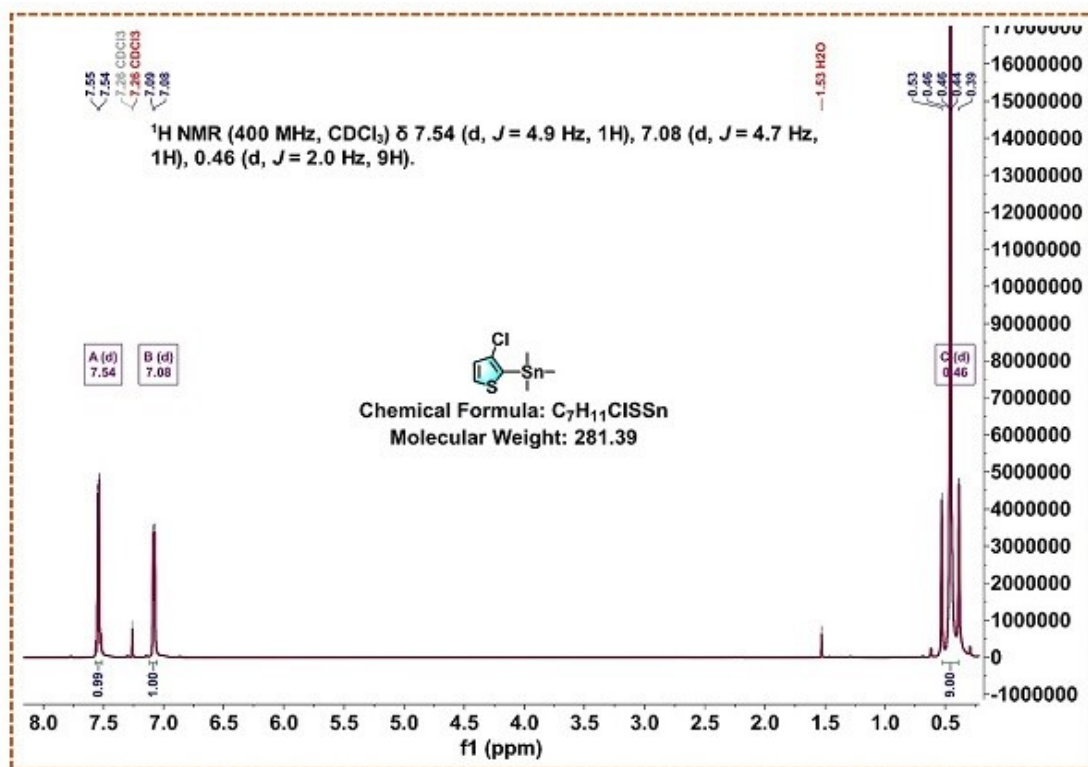

Figure S6. <sup>1</sup>H-NMR spectrum of compound (V) in chloroform-*d*.

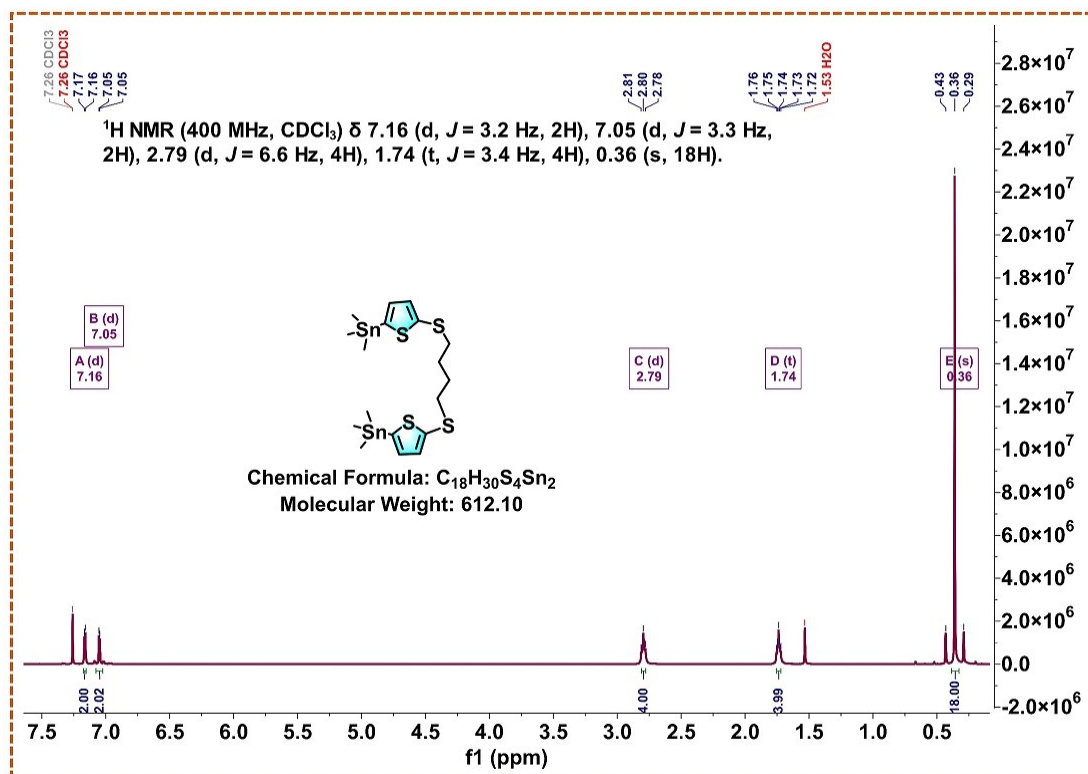

Figure S7. <sup>1</sup>H-NMR spectrum of compound (VII) in chloroform-*d*.

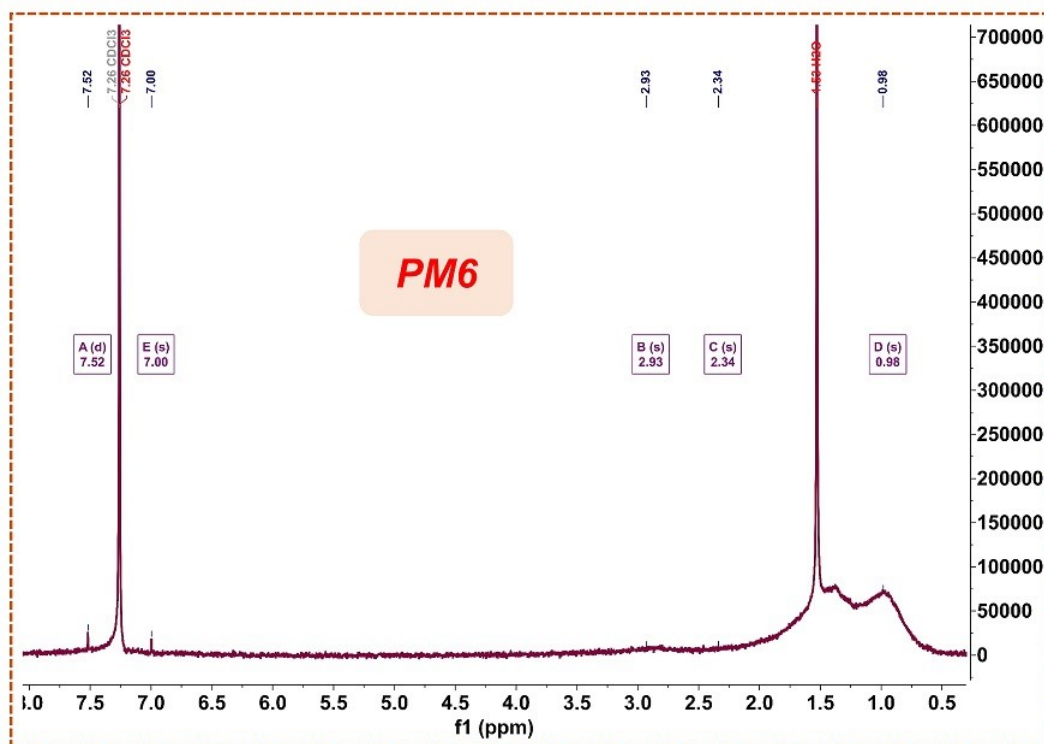

Figure S8.  $^1\text{H-NMR}$  spectrum of **PM6** in chloroform-*d*.

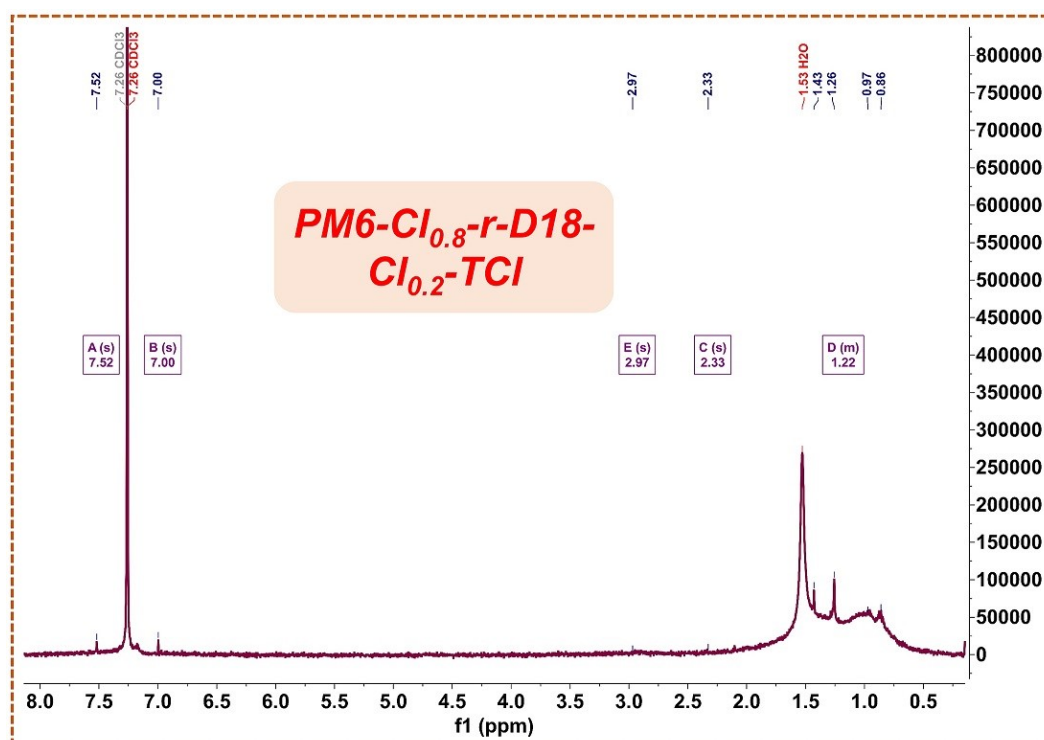

Figure S9.  $^1\text{H-NMR}$  spectrum of *random* MCD (IX) **PM6-Cl<sub>0.8</sub>-r-D18-Cl<sub>0.2</sub>-TCI** in chloroform-*d*.

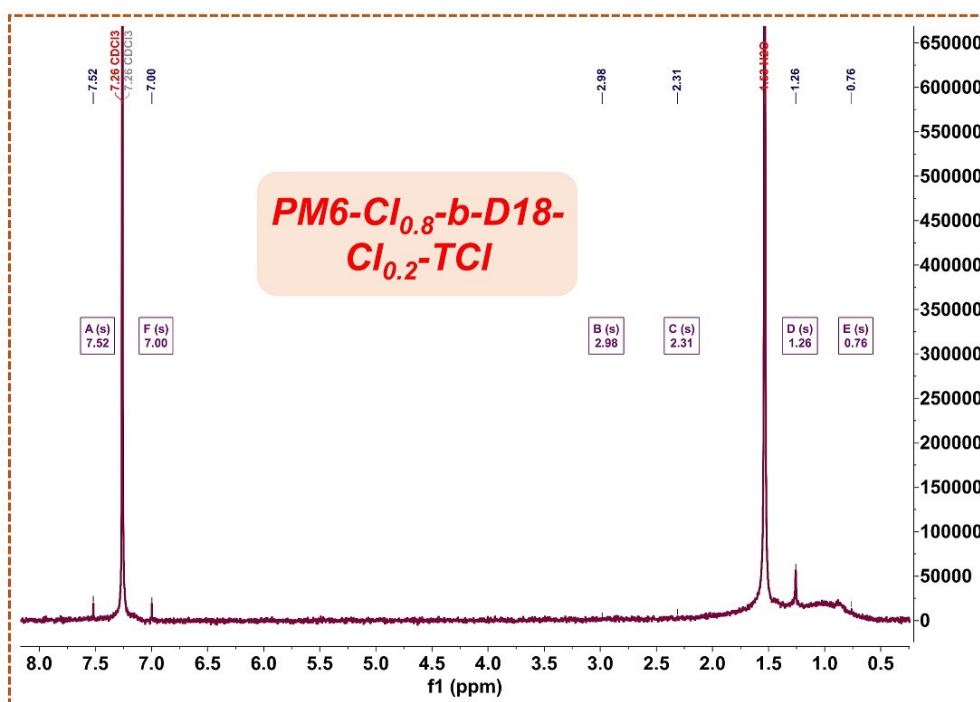

**Figure S10.** <sup>1</sup>H-NMR spectrum of *sequentially-block* MCD (VI) PM6-Cl<sub>0.8</sub>-b-D18-Cl<sub>0.2</sub>-TCl in chloroform-*d*.

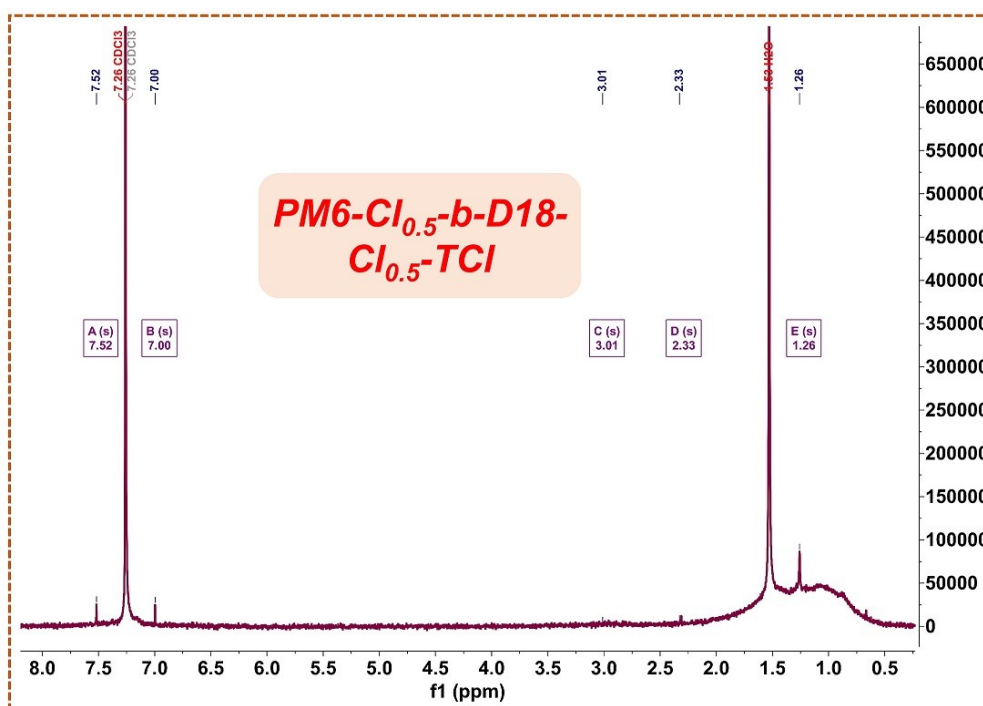

**Figure S11.** <sup>1</sup>H-NMR spectrum of *sequentially-block* MCD (VI) PM6-Cl<sub>0.5</sub>-b-D18-Cl<sub>0.5</sub>-TCl in chloroform-*d*.

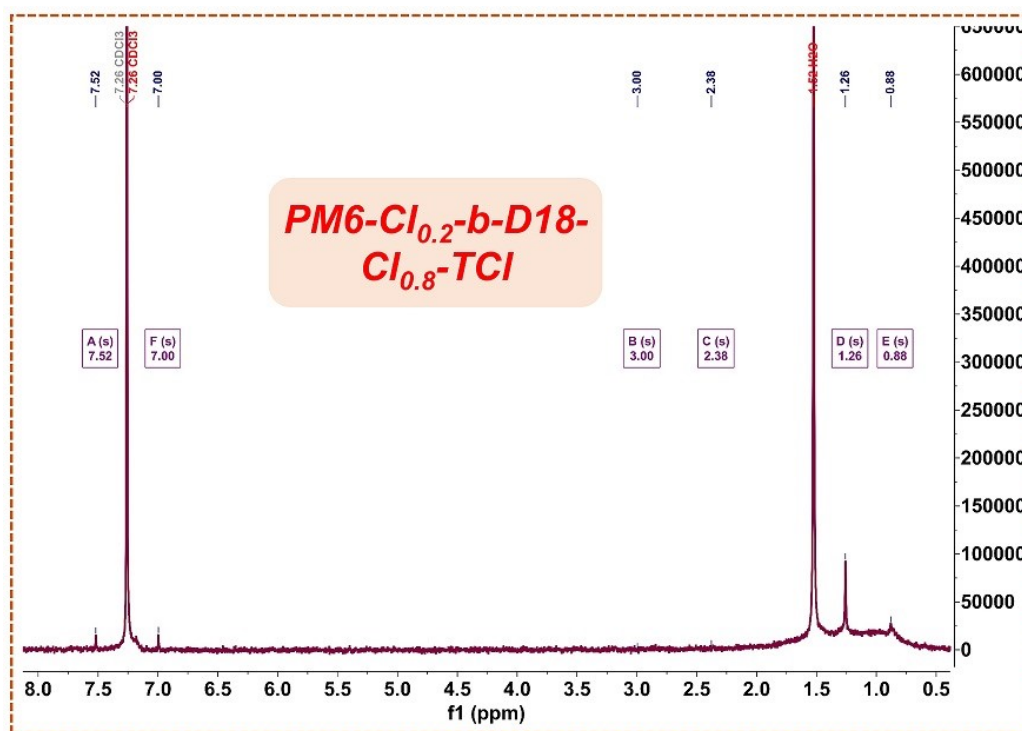

**Figure S12.** <sup>1</sup>H-NMR spectrum of *sequentially-block* MCD (VI) PM6-Cl<sub>0.2</sub>-b-D18-Cl<sub>0.8</sub>-TCl in chloroform-*d*.

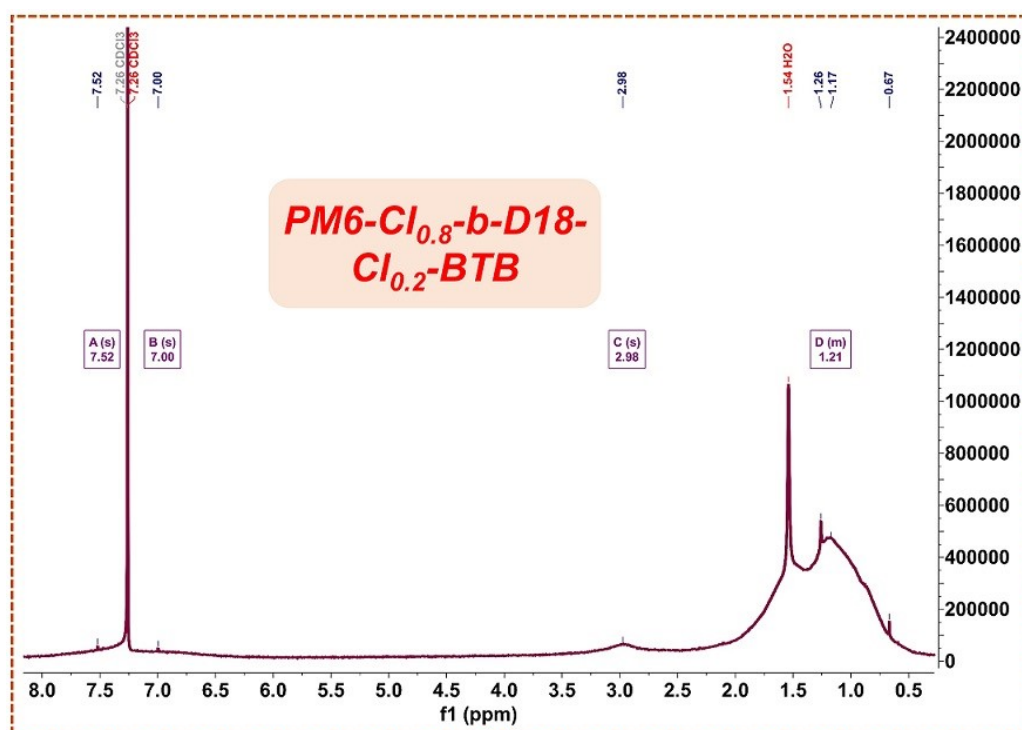

**Figure S13.** <sup>1</sup>H-NMR spectrum of *flexible-spacer block* MCD (VIII) PM6-Cl<sub>0.8</sub>-b-D18-Cl<sub>0.2</sub>-BTB in chloroform-*d*.

### 3. Measurements and Instruments

#### **Rigid device fabrication and measurement:**

The rigid binary OSCs based on **PM6**, **PM6-Cl<sub>0.8-r</sub>-D18-Cl<sub>0.2</sub>-TCl**, **PM6-Cl<sub>0.8-b</sub>-D18-Cl<sub>0.2</sub>-TCl**, **PM6-Cl<sub>0.5-b</sub>-D18-Cl<sub>0.5</sub>-TCl**, **PM6-Cl<sub>0.2-b</sub>-D18-Cl<sub>0.8</sub>-TCl**, **PM6-Cl<sub>0.8-b</sub>-D18-Cl<sub>0.2</sub>-BTB**, and **PM6-Cl<sub>0.8-b</sub>-D18-Cl<sub>0.2</sub>-TCl: PM6 (0.1: 0.9)** were fabricated employing the conventional architecture of ITO/4PADCB or Poly(3,4-ethylenedioxythiophene):polystyrene sulfonate (PEDOT: PSS) 4083/MCD: BTP-eC9 (1.0: 1.2, w/w)/perylene-diimide (PDINN)/Ag. The ITO glass was cleaned with deionized water, acetone and isopropanol in sequence, then treated with the UV-Ozone for 15 minutes. The 4PADCB or PEDOT: PSS 4083 solution was spin-coated at 3000 rpm onto the ITO substrates for 30 seconds. Then the 4PADCB film was heated at 100 °C in air for 10 min. The MCD and Y6 were dissolved in solution, the concentration of MCDs in chloroform (CF) solvent was 5.6 mg ml<sup>-1</sup>, with the solution additive **diiodooctane (DIO)** of 0.3 %. Meanwhile, the solution need be stirred at 45 °C at least 4 h to fully dissolve the donor. Then the solution was spin-coated with a speed of 4000 r min<sup>-1</sup> on the PEDOT: PSS 4083 layer and treated with 95°C thermal annealing for 10 minutes. With the PDINN (1 mg ml<sup>-1</sup>, 2000 r min<sup>-1</sup>) spin-coated on the active layer, the devices were finally transferred to the evaporation tank to deposit Ag of 160 nm. *J-V* measurements of devices were carried out in the **Keithley 2440 source meter** with a solar simulator (**Newport-Oriel® Sol3A 450W**) device. EQE measurements were conducted with the solar cell QE tester (**QE-R, Enli Technology Co., Ltd**).

#### **Flexible OSCs fabrication:**

The structure of the flexible device was PEN/ITO/4PADCB/active layer/PDINN/Ag. The PEN/ITO first was adhered onto polydimethylsiloxane (PDMS)-coated glass substrates. The preparation conditions for the 4PADCB and active layer are the same as those for the rigid device. Subsequently, PDINN spin-coated at 2000 rpm for 30 s. Finally, Ag was thermally deposited as an electrode.

### Cyclic Voltammetry (CV)

The energy levels for **PM6**, **PM6-Cl<sub>0.8-r</sub>-D18-Cl<sub>0.2</sub>-TCl**, **PM6-Cl<sub>0.8-b</sub>-D18-Cl<sub>0.2</sub>-TCl**, **PM6-Cl<sub>0.5-b</sub>-D18-Cl<sub>0.5</sub>-TCl**, **PM6-Cl<sub>0.2-b</sub>-D18-Cl<sub>0.8</sub>-TCl**, and **PM6-Cl<sub>0.8-b</sub>-D18-Cl<sub>0.2</sub>-BTB**, were measured by cyclic voltammetry (CV), which was performed by using Ag/AgCl as reference electrode in C<sub>16</sub>H<sub>36</sub>NPF<sub>6</sub> solution, and ferrocene/ferrocenium (Fc/Fc<sup>+</sup>) was used as internal reference. The *HOMO* and *LUMO* energy levels were calculated according to the following equation:

$$\text{HOMO/LUMO} = -(\varphi_{\text{ox/red}} - \varphi_{\text{Fc/Fc}^+} + 4.8) \text{ eV}$$

Where  $\varphi_{\text{OX}}$  is the onset of oxidation and the  $\varphi_{\text{red}}$  relates to the reduction potential, respectively.

### Elemental analysis characterization

The mass ratio of elements Carbon (C), nitrogen (N), sulfur (S), and hydrogen (H) were tested by **vario ELCUBE**, meanwhile, the mass of each test sample is around 5mg.

### GPC characterization

The number-average molecular weight ( $M_n$ ),  $M_w$  and polydispersity index (*PDI*) were acquired on **PL-GPC 220** in 1, 2, 4-trichlorobenzene at 150 °C, with the flow rate of 1ml min<sup>-1</sup>. The data detection results and reports are provided by **Shanghai Fuda Testing Technology Group Co., Ltd.**

## AFM PFQNM

The DMT modulus, adhesion, deformation, and AFM images were obtained from peak force quantitation nanomechanical mapping (PFQNM) and tapping mode by a **Veeco Dimension 3100V atomic force microscope**.

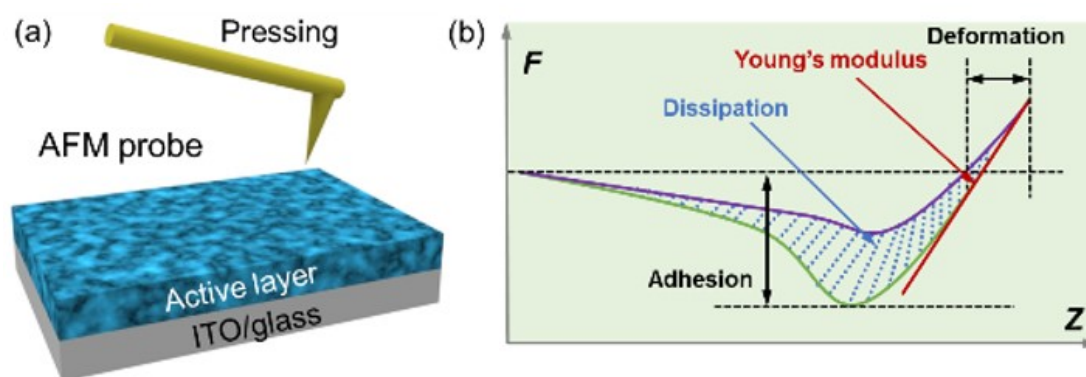

**Figure S14.** (a) Schematic diagram of the AFM PFQNM technology. (b) Schematic diagram of a full force-distance curve. The Young's modulus can be extracted by extrapolating the linear portion of the retraction curve after the contact point. The adhesion is the vertical distance between the base line and the bottom most part of the retraction curve.

## Pseudo free-standing tensile test

Stress-strain curves were tested on in-situ micro-mechanical testing system (**PR-MMT6SL-100F, Shenzhen HuaJason Technologies, Co., LTD.**). The films ( $5.6 \text{ mg ml}^{-1}$ ) were spin-casted (3000 rms, 30 s) onto the PEDOT: PSS 4083-coated glass substrate at first, and then cut into long strips approximately 5 mm wide and 20 mm long to assemble the sample. Afterward, the films were floated onto the water surface, and attached to the grips by van der Waals forces. The strain was applied at a fixed strain rate, and the tensile load values were measured by a load cell with high resolution, meanwhile; corresponding characterization results were calculated with the film thickness of 100 nm.



## **Ultraviolet-Visible-Near Infrared (UV-Vis-NIR)**

Ultraviolet-Visible-Near Infrared (UV-Vis-NIR) absorption spectra were acquired on a **Perkin-Elmer Lambda 950 spectrophotometer**.

### ***In-situ* absorption spectra**

In-situ UV-vis absorption measurements were performed by the Filmetrics F20-EXR spectrometer using the transmission mode with a time resolution of 0.025 s. The spectrometer consists of a light source and detector. The light source and detector are fixed above and below the substrate, respectively, and on the same vertical line. The solution was injected into the slot, and the film was coated onto the glass substrate. The detector collects the transmission spectra ranging from 400 to 1050 nm during coating. The UV-vis absorption spectra are calculated from the transmission spectra according to the equation  $A_\lambda = -\log_{10}(T)$ , where  $A_\lambda$  is the absorbance at a certain wavelength ( $\lambda$ ), and T is the calculated transmittance. The light source and detector were turned on before coating the film, so time zero is the point when the first solution transmission spectrum was collected by the detector. Before time zero, there is only noise in the transmission spectra.

The authors thank Dr. Bin Hu (Xi'an Jiaotong University) for assistance with data acquisition.

### ***In-situ* photoluminescence (PL) spectra**

In-situ Photoluminescence Spectra Measurements were performed by a laser device (**MGL-III-785-300mW BH81223**) with a time resolution of 0.025 s.

### **Femtosecond transient absorption (fs-TA)**

The ultrafast fs-TA measurements were conducted on a fs pump-probe system in association with an amplified laser system under ambient conditions, which consist of a modelocked Ti:sapphire seed laser (**Spectra Physics, Maitai**) directed to a regenerative amplifier (**Spitfire Pro, Spectra Physics**) and a high power laser

(**Empower, Spectra Physics**) used for pumping and amplifier. The amplified 800 nm output was divided into two parts, and the pump pulses with tunable wavelength were generated by the major part of the beam (~85%) after an optical parametric amplifier (**TOPAS prime, Spectra Physics**), while the white-light continuum (**WLC**) probe and reference pulses (420–780 nm) were generated by the rest part of the beam passed through an optical delay line, here, the probe beam traveled through the sample and the reference beam was sent directly to the reference spectrometer. A chopper which can modulate the pump pulses was employed to obtain fs-TA spectra with and without the pump pulses alternately, and an optics fiber coupled to a multichannel spectrometer with a CMOS sensor was used to record the pump-induced fluctuation in probe/reference beam intensity with adjusting the optical delay line (maximum ~3ns). The spectral profiles were further processed by the **Surface Explorer**.

### **Space charge limited current (SCLC) method**

Electron-only devices were fabricated using the structure of ITO/Ag/active layers/PDINN/Ag. Firstly, after being cleaned with deionized water, acetone and isopropanol, the all-ITO glass was deposited with 100 nm Ag and then the ternary polymer donors and acceptor were spin-coated on the Ag layer and treated with 100 °C for 10 minutes. With the PDINN spin-coated on the active layer, the devices were finally transferred to the evaporation tank to deposit 160 nm Ag.

Hole-only devices were fabricated with the structure of ITO/PEDOT: PSS 4083/active layers/MoO<sub>3</sub>/Ag. After being cleaned with deionized water, acetone and isopropanol, the all-ITO glass was treated with the UV-Ozone for 15 minutes. The PEDOT: PSS 4083 solution was spin-coated at 3000 rpm onto the ITO substrates for 30 seconds. Then the PEDOT: PSS 4083 film was heated at 150 °C for 10 min in atmosphere. Then the donor and acceptor were spin-coated on the PEDOT: PSS 4083 layer and treated with 95 °C for 10 minutes. Then devices were finally transferred to the evaporation tank to deposit 10 nm MoO<sub>3</sub> and then 160 nm Ag.

The mobilities were obtained by taking current-voltage curves and fitting the results to a space charge limited form, where the SCLC is described by:

$$J = \frac{9\varepsilon_0\varepsilon_R\mu V^2}{8L^3}$$

Where  $\varepsilon_0$  is the permittivity of free space ( $8.854 \times 10^{-12}$  F m<sup>-1</sup>),  $\varepsilon_R$  is the relative permittivity of the material (assumed to be 3),  $\mu$  is the electron or hole mobility and L is the thickness of the film. From the plots of  $J^{1/2}$  vs  $V$ , electron or hole mobilities can be deduced.

### Morphology Characterization

AFM height and phase images were measured by **Bruker Dimension ICON** to explore the characteristic of morphology. GIWAXS measurements were performed on a XEUSS SAXS/WAXS system (**Xeuss 3.0**) at the Suzhou institute of Nano-Tech and Nano-Bionics (**SINANO**).

### Contact angle measurement

Contact angles were measured from spin-coated films by an optical contact angle meter (CAM 200). The surface energy was estimated by the Harmonic mean equations:

$$(1 + \cos \theta_1)\gamma_1 = 2(\gamma_1^d\gamma_s^d)^{\frac{1}{2}} + 2(\gamma_1^p\gamma_s^p)^{\frac{1}{2}}$$

$$(1 + \cos \theta_2)\gamma_2 = 2(\gamma_2^d\gamma_s^d)^{\frac{1}{2}} + 2(\gamma_2^p\gamma_s^p)^{\frac{1}{2}}$$

$$\gamma_s = \gamma_s^d + \gamma_s^p$$

where  $\gamma_s^d$  represents the dispersive components,  $\gamma_s^p$  is the polar component,  $\gamma_s$  is the surface energy.  $\theta_1$  and  $\theta_2$  are the contact angles of pure water and glycerol, respectively.

$$\text{H}_2\text{O}: \gamma_1 = 72.8 \text{ mJ/m}^2, \gamma_1^d = 21.8 \text{ mJ/m}^2, \gamma_1^p = 51.0 \text{ mJ/m}^2.$$

$$\text{Diiodomethane}: \gamma_2 = 50.8 \text{ mJ/m}^2, \gamma_2^d = 48.5 \text{ mJ/m}^2, \gamma_2^p = 2.3 \text{ mJ/m}^2.$$

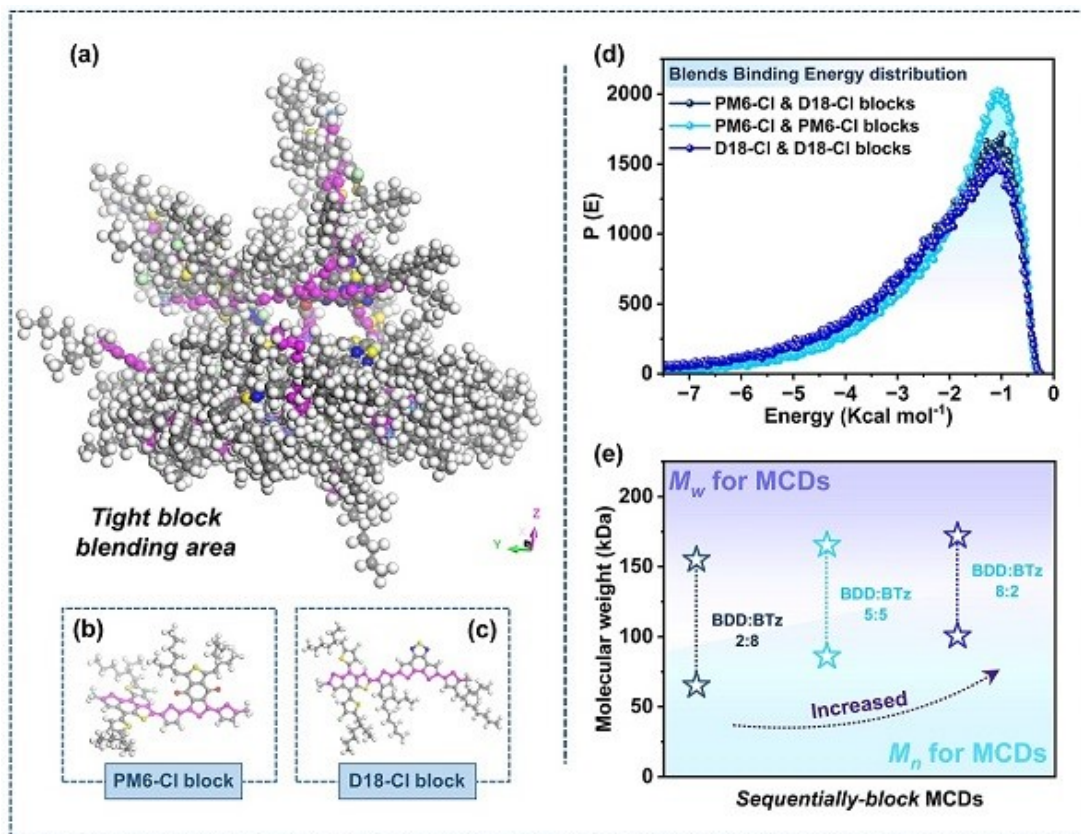

**Figure S15.** The blending binding energy result of electronic active blocks PM6-Cl (b) and D18-Cl (c) blocks: Simulation diagram of lowest energy blending with 50 pairs of PM6-Cl and D18-Cl blocks (a) and corresponding blends binding energy distribution between PM6-Cl and PM6-Cl blocks, PM6-Cl and D18-Cl blocks, and D18-Cl and D18-Cl blocks (d), both results were calculated based on **Materials Studio 8.0** at **Blends calculations**. The correlation between molecular weight and blending ratio in *sequentially-block* MCDs.

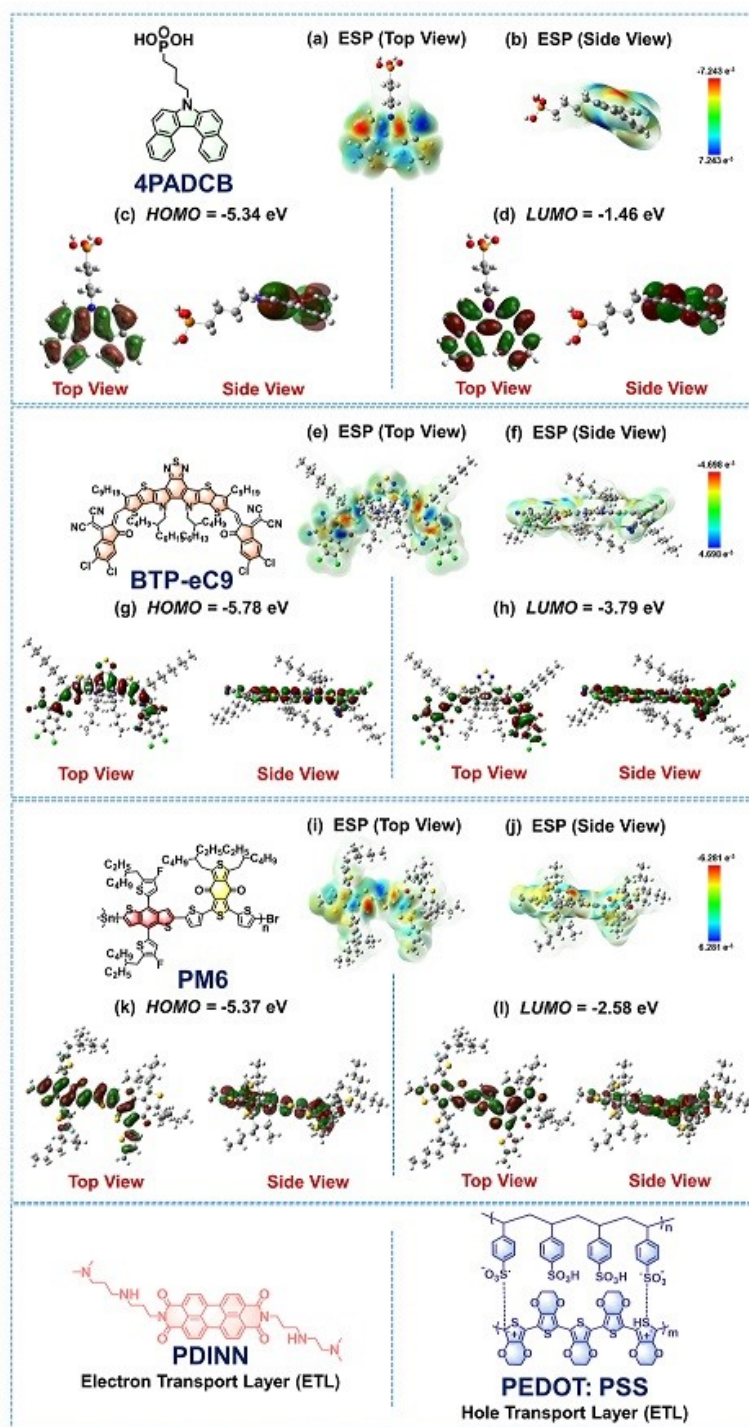

**Figure S16.** The detailed molecular structure of self-assembled molecule (SAM) **4PADCB**, acceptor **BTP-eC9**, donor **PM6**, electron transport layer **PDINN**, and hole transport layer **PEDOT: PSS** as well as theoretical calculations based on DFT theory at **B3LYP/6-31G (d, p)** level: ESP distribution in top view (a, e, and i) and side view (b, f, and j); *HOMO* (c, g, and k) and *LUMO* (d, h, and l) energy levels in top view and side view.

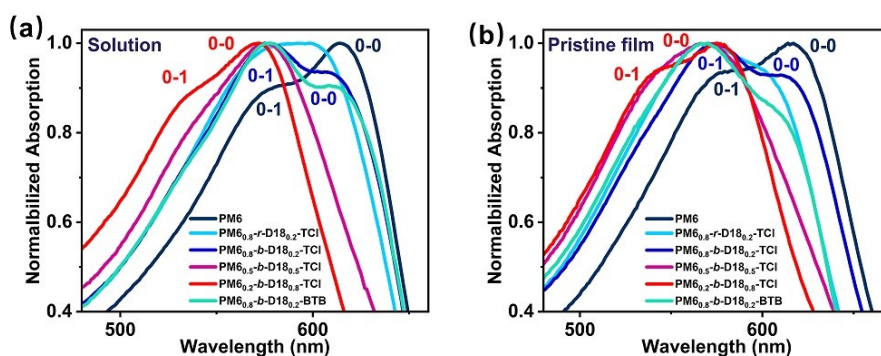

**Figure S17.** UV-vis-NIR absorption curve of partial enlarged image for MCDs PM6, PM6-Cl<sub>0.8</sub>-*r*-D18-Cl<sub>0.2</sub>-TCl, PM6-Cl<sub>0.8</sub>-*b*-D18-Cl<sub>0.2</sub>-TCl, PM6-Cl<sub>0.5</sub>-*r*-D18-Cl<sub>0.5</sub>-TCl, PM6-Cl<sub>0.2</sub>-*r*-D18-Cl<sub>0.8</sub>-TCl, and PM6-Cl<sub>0.8</sub>-*b*-D18-Cl<sub>0.2</sub>-BTB in solution (a) and film (b).

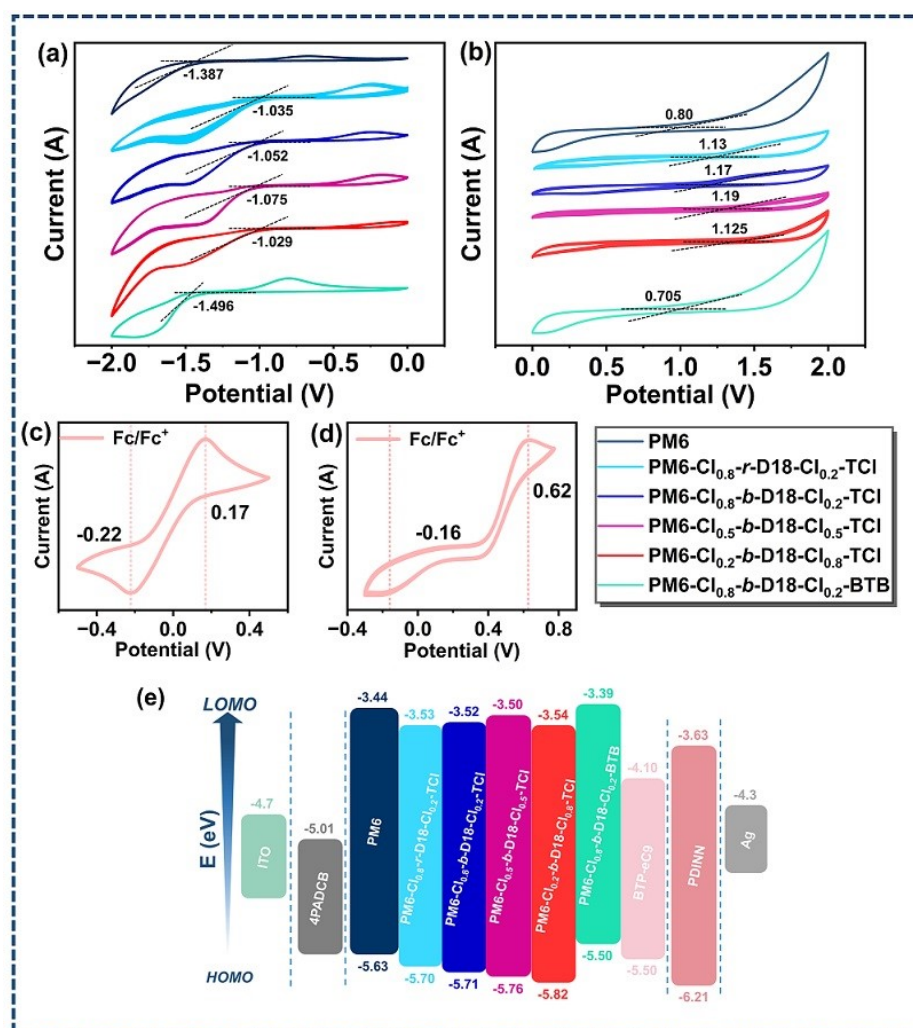

**Figure S18.** Cyclic voltammety curves of PM6, PM6-Cl<sub>0.8</sub>-*r*-D18-Cl<sub>0.2</sub>-TCl, PM6-Cl<sub>0.8</sub>-*b*-D18-Cl<sub>0.2</sub>-TCl, PM6-Cl<sub>0.5</sub>-*r*-D18-Cl<sub>0.5</sub>-TCl, PM6-Cl<sub>0.2</sub>-*r*-D18-Cl<sub>0.8</sub>-TCl, and

PM6-Cl<sub>0.8</sub>-*b*-D18-Cl<sub>0.2</sub>-BTB (a, b); Fc/Fc<sup>+</sup> curve related on PM6 and P1<sub>0.8</sub>-*b*-P2<sub>0.2</sub>-BTB (c); Fc/Fc<sup>+</sup> curve related on P1<sub>0.8</sub>-*r*-P2<sub>0.2</sub>-TCl, P1<sub>0.8</sub>-*b*-P2<sub>0.2</sub>-TCl, P1<sub>0.5</sub>-*b*-P2<sub>0.5</sub>-TCl, and P1<sub>0.2</sub>-*b*-P2<sub>0.8</sub>-TCl (d); The detailed *HOMO/LUMO* energy level values for corresponding MCD materials (e).

\* By making tangent lines to the starting part of the oxidation current curve scanned in the positive potential direction and the starting part of the reduction current curve scanned in the negative potential direction on the cyclic voltammetry curve, the starting oxidation potential ( $\varphi_{ox}$ ) and starting reduction potential ( $\varphi_{red}$ ) values of MCDs can be obtained by intersecting the tangent lines with the horizontal axis. Therefore, the  $\varphi_{ox}$  values of PM6, PM6-Cl<sub>0.8</sub>-*r*-D18-Cl<sub>0.2</sub>-TCl, PM6-Cl<sub>0.8</sub>-*b*-D18-Cl<sub>0.2</sub>-TCl, PM6-Cl<sub>0.5</sub>-*r*-D18-Cl<sub>0.5</sub>-TCl, PM6-Cl<sub>0.2</sub>-*r*-D18-Cl<sub>0.8</sub>-TCl, and PM6-Cl<sub>0.8</sub>-*b*-D18-Cl<sub>0.2</sub>-BTB were -1.387 V, -1.035 V, -1.052 V, -1.075 V, -1.029 V, and -1.496 V in turn. The  $\varphi_{red}$  values of PM6, PM6-Cl<sub>0.8</sub>-*r*-D18-Cl<sub>0.2</sub>-TCl, PM6-Cl<sub>0.8</sub>-*b*-D18-Cl<sub>0.2</sub>-TCl, PM6-Cl<sub>0.5</sub>-*r*-D18-Cl<sub>0.5</sub>-TCl, PM6-Cl<sub>0.2</sub>-*r*-D18-Cl<sub>0.8</sub>-TCl, and PM6-Cl<sub>0.8</sub>-*b*-D18-Cl<sub>0.2</sub>-BTB were 0.80 V, 1.13 V, 1.17 V, 1.19 V, 1.125 V, and 0.705 V, respectively.

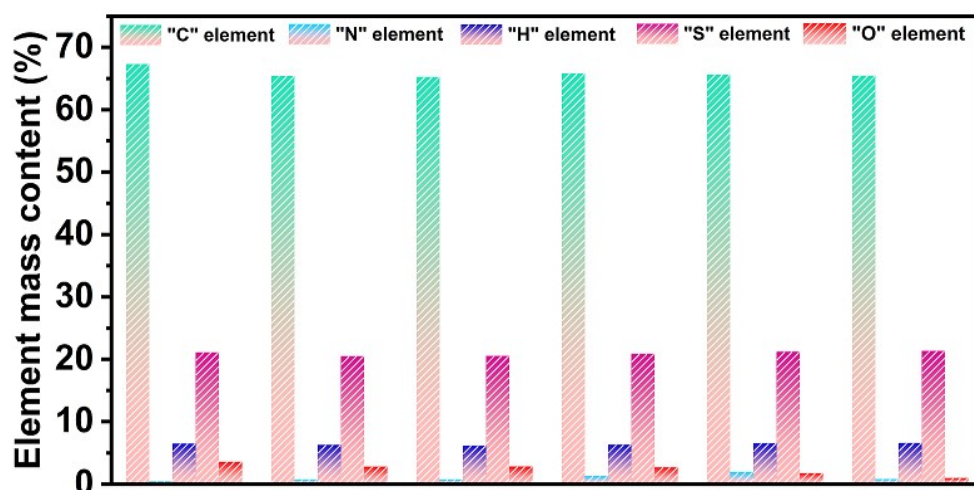

Figure S19. The elemental analysis characterization for PM6, PM6-Cl<sub>0.8</sub>-*r*-D18-Cl<sub>0.2</sub>-TCl, PM6-Cl<sub>0.8</sub>-*b*-D18-Cl<sub>0.2</sub>-TCl, PM6-Cl<sub>0.5</sub>-*r*-D18-Cl<sub>0.5</sub>-TCl, PM6-Cl<sub>0.2</sub>-*r*-D18-Cl<sub>0.8</sub>-TCl, and PM6-Cl<sub>0.8</sub>-*b*-D18-Cl<sub>0.2</sub>-BTB.

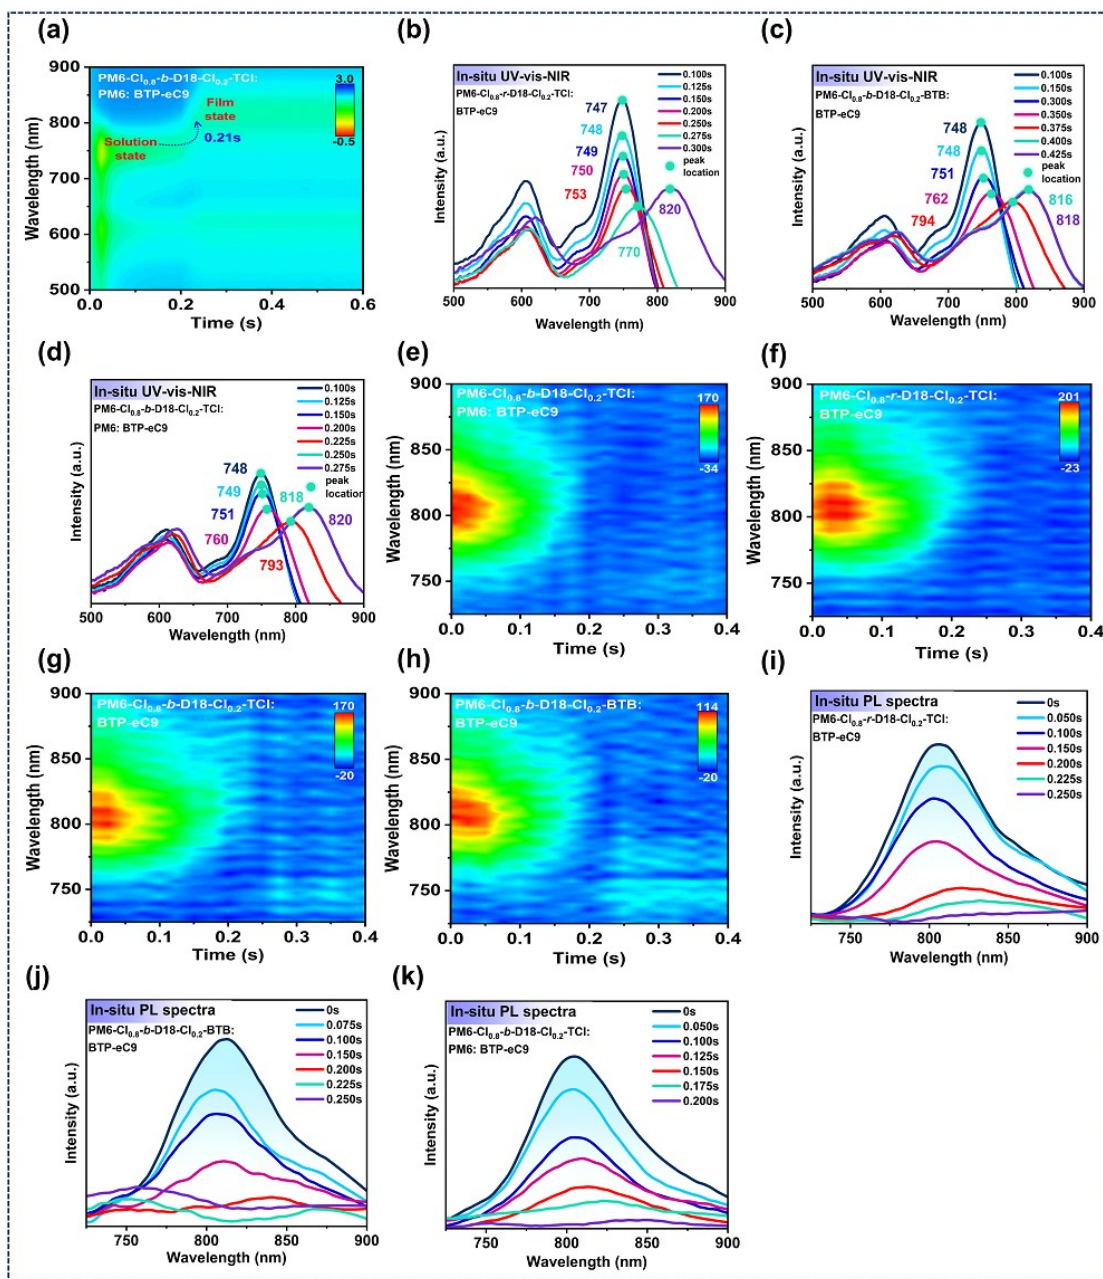

**Figure S20.** The 2D *in-situ* absorption spectra for PM6-Cl<sub>0.8</sub>-*b*-D18-Cl<sub>0.2</sub>-TCl: PM6-based blend system (a) as well as 1D *in-situ* absorption spectra characterization results for PM6-Cl<sub>0.8</sub>-*r*-D18-Cl<sub>0.2</sub>-TCl-based (b), PM6-Cl<sub>0.8</sub>-*b*-D18-Cl<sub>0.2</sub>-BTB (c), and PM6-Cl<sub>0.8</sub>-*b*-D18-Cl<sub>0.2</sub>-TCl: PM6-based (d) systems; 2D photoluminescence (PL) spectra characterization for PM6-Cl<sub>0.8</sub>-*r*-D18-Cl<sub>0.2</sub>-TCl-based (f), PM6-Cl<sub>0.8</sub>-*b*-D18-Cl<sub>0.2</sub>-TCl-based (g), PM6-Cl<sub>0.8</sub>-*b*-D18-Cl<sub>0.2</sub>-BTB (h), and PM6-Cl<sub>0.8</sub>-*b*-D18-Cl<sub>0.2</sub>-TCl: PM6-based (e) systems as well as corresponding 1D PL spectra characterization results (i-k).



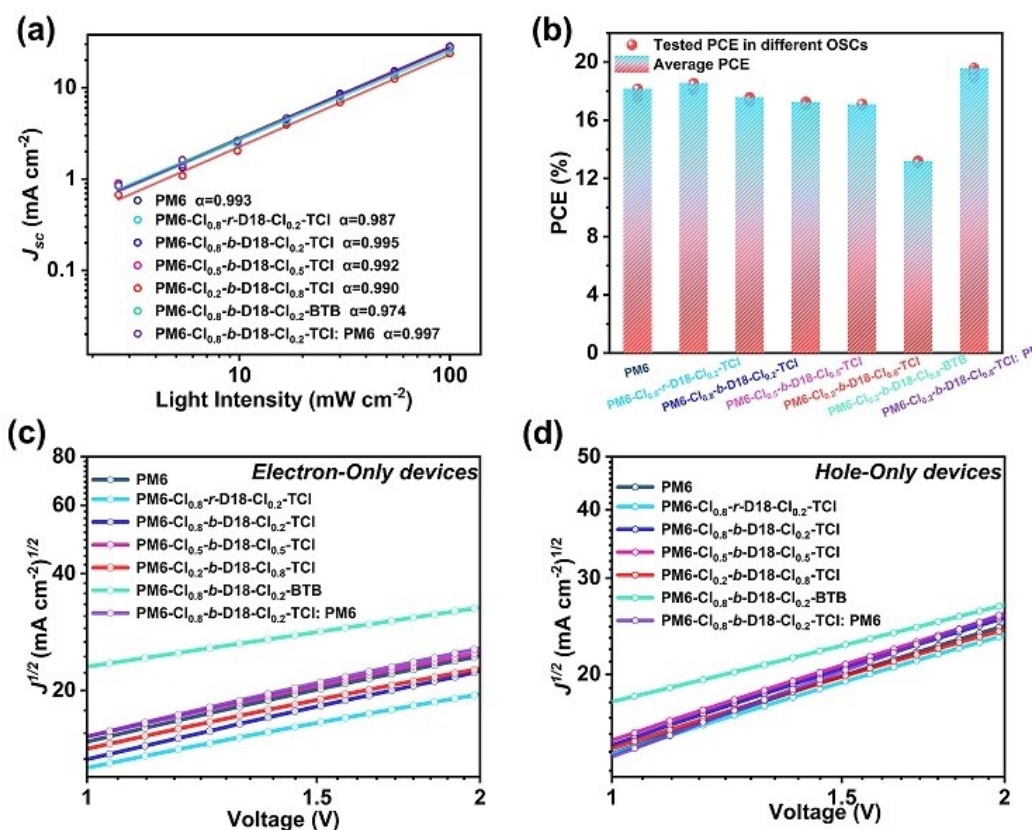

**Figure S21.** Light intensity dependence of  $J_{sc}$  for MCDs (a); The average PCE tested based on different MCD-based OSCs; SCLC test for hole (i) and electron (j) based on MCD-based OSCs.

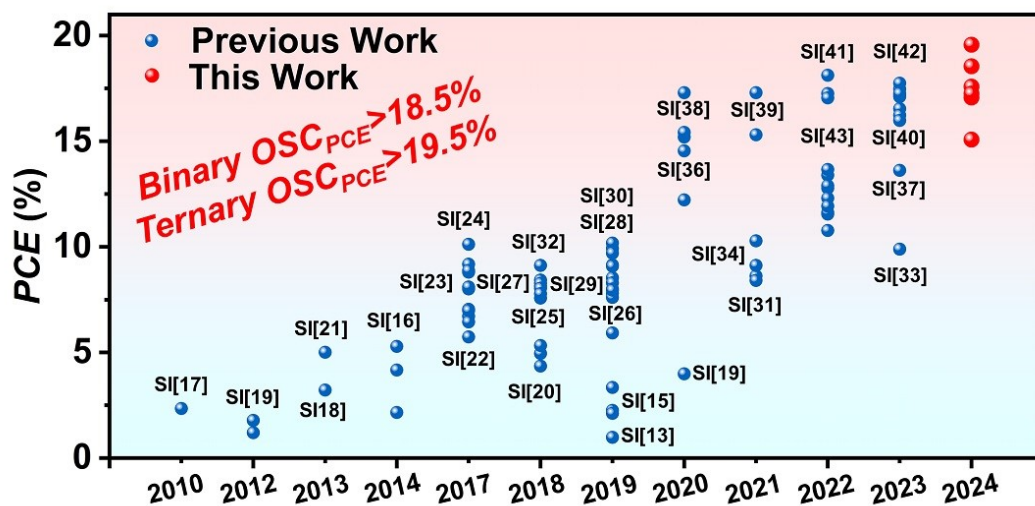

**Figure 22.** Evolution diagram of photovoltaic performance of MCD-based OSC, data sourced from Table S2.

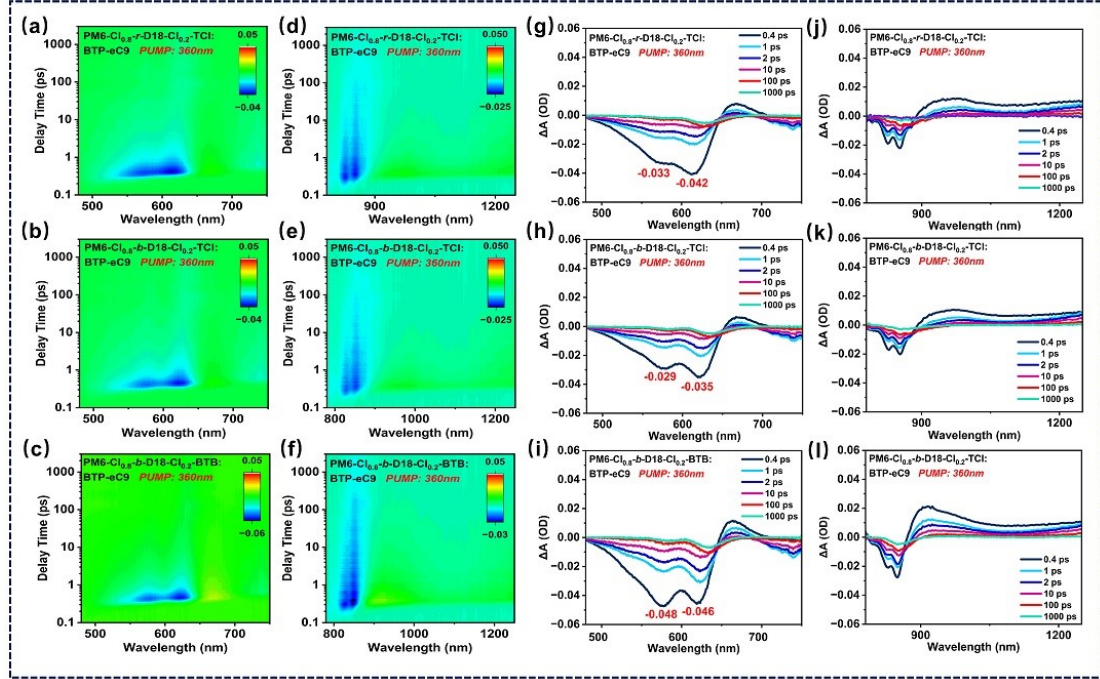

**Figure S23.** 2D TA image of the MCD: BTP-eC9 blend films for *random* MCD **PM6-Cl<sub>0.8</sub>-r-D18-Cl<sub>0.2</sub>-TCI** (a and d), *sequentially-block* MCD **PM6-Cl<sub>0.8</sub>-b-D18-Cl<sub>0.2</sub>-TCI** (b and e), and *flexible spacer-block* MCD **PM6-Cl<sub>0.8</sub>-b-D18-Cl<sub>0.2</sub>-BTB** (c and f) as well as 1D absorption spectrum at indicated delay times during the UV-visible absorption range (g, h, and i) and near-infrared absorption range (j, k, and l).

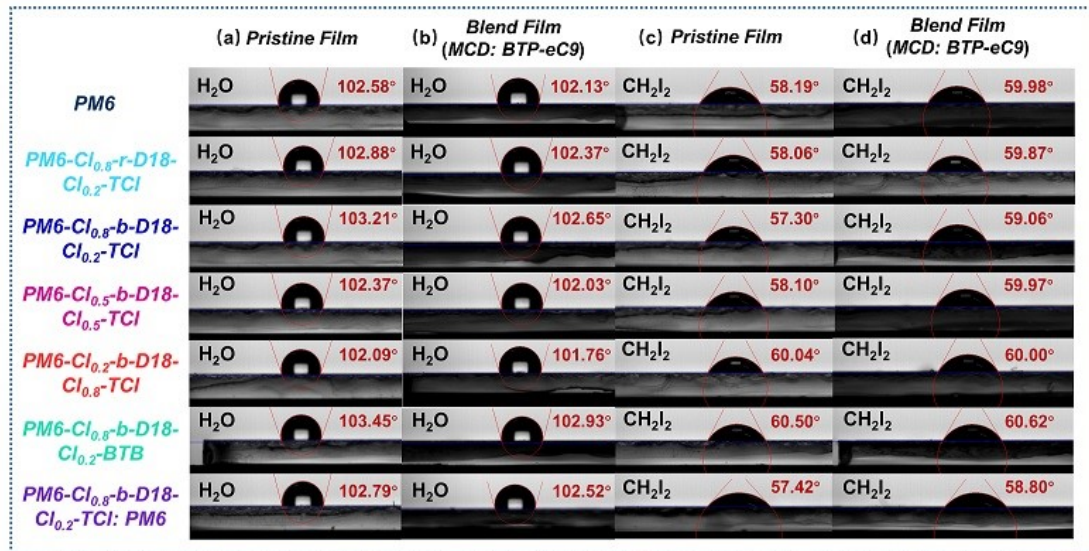

**Figure S24.** The contact angles of pristine MCD films in water (a) and diiodomethane (c) as well as MCD: BTP-eC9 blend films in in water (b) and diiodomethane (d).

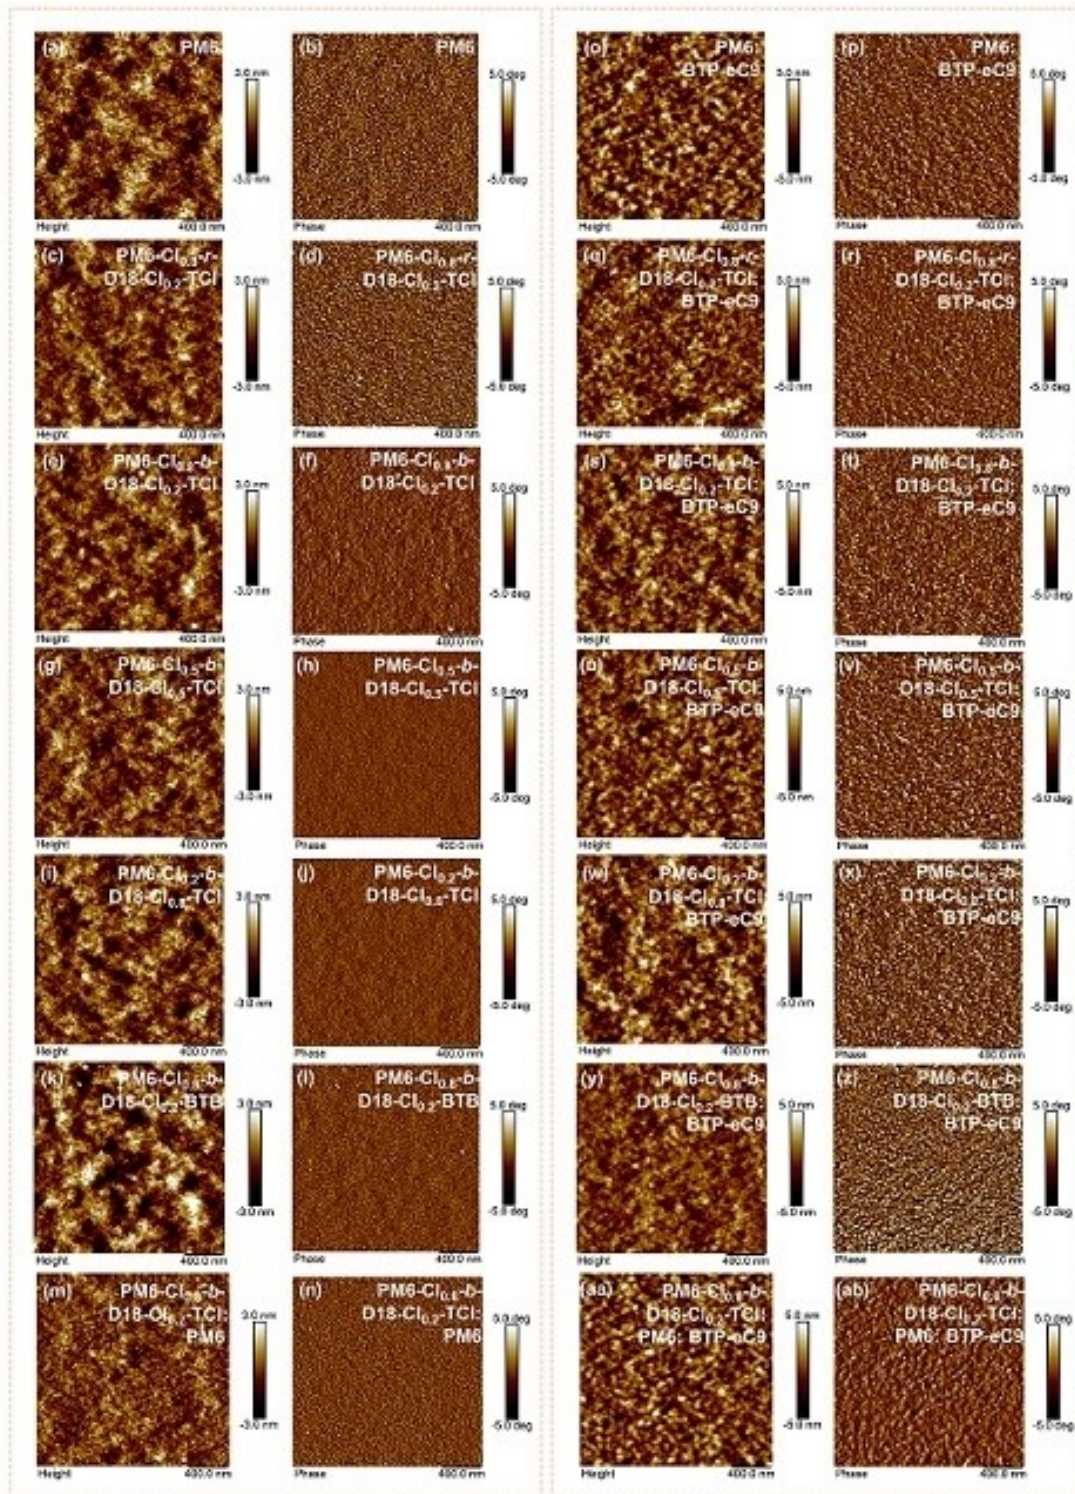

**Figure S25.** AFM characterization of high figures ( $2 \times 2 \mu\text{m}$ ) and phase figures ( $2 \times 2 \mu\text{m}$ ) of pristine MCD films **PM6** (a, b), **PM6-Cl<sub>0.8</sub>-r-D18-Cl<sub>0.2</sub>-TCl** (c, d), **PM6-Cl<sub>0.8</sub>-b-D18-Cl<sub>0.2</sub>-TCl** (e, f), **PM6-Cl<sub>0.5</sub>-b-D18-Cl<sub>0.5</sub>-TCl** (g, h), **PM6-Cl<sub>0.2</sub>-b-D18-Cl<sub>0.8</sub>-TCl** (i, j), **PM6-Cl<sub>0.8</sub>-b-D18-Cl<sub>0.2</sub>-BTB** (k, l), and **PM6-Cl<sub>0.8</sub>-b-D18-Cl<sub>0.2</sub>-TCl: PM6** (m, n) as well as corresponding MCD: BTP-eC9 blend films **PM6: BTP-eC9** (o, p), **PM6-Cl<sub>0.8</sub>-r-D18-Cl<sub>0.2</sub>-TCl: BTP-eC9**

(q, r), PM6-Cl<sub>0.8</sub>-*b*-D18-Cl<sub>0.2</sub>-TCl: BTP-eC9 (s, t), PM6-Cl<sub>0.5</sub>-*b*-D18-Cl<sub>0.5</sub>-TCl: BTP-eC9: BTP-eC9 (u, v), PM6-Cl<sub>0.2</sub>-*b*-D18-Cl<sub>0.8</sub>-TCl: BTP-eC9 (w, x), PM6-Cl<sub>0.8</sub>-*b*-D18-Cl<sub>0.2</sub>-BTB: BTP-eC9 (y, z), and PM6-Cl<sub>0.8</sub>-*b*-D18-Cl<sub>0.2</sub>-TCl: PM6: BTP-eC9 (aa, ab).

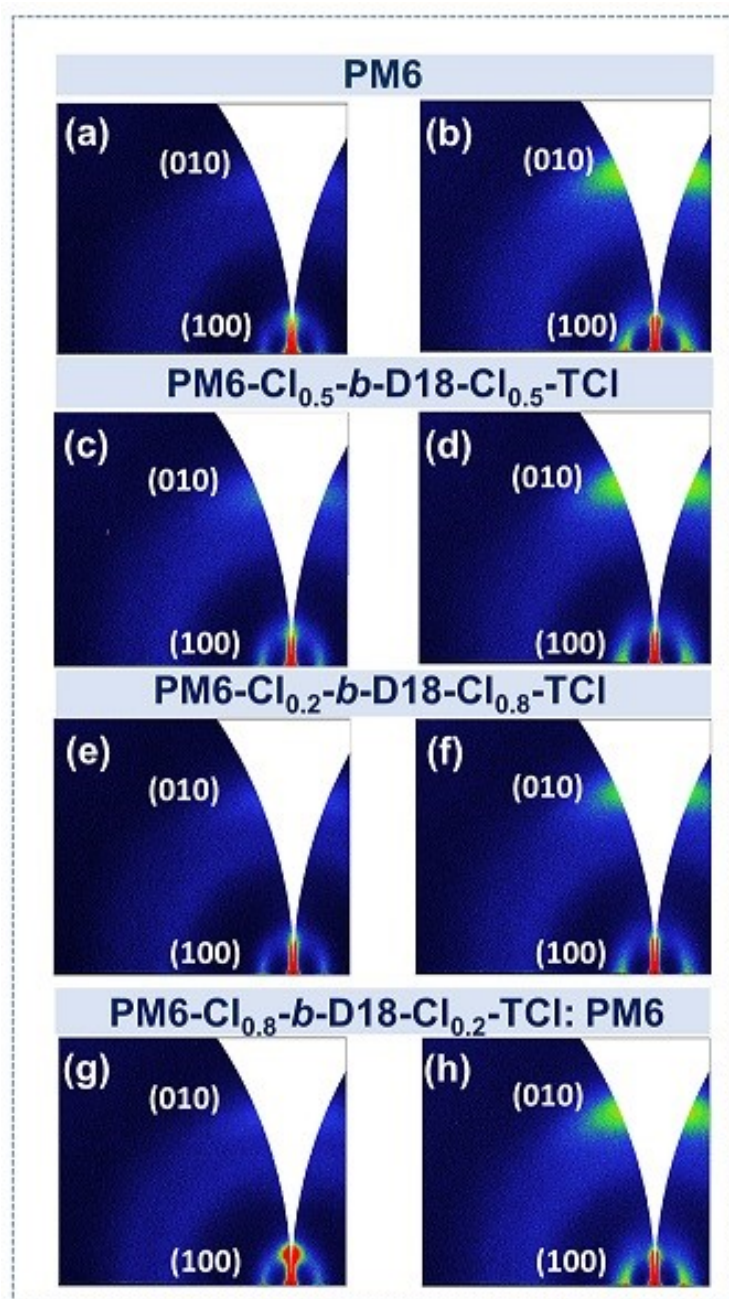

**Figure S26.** 2D GIWAXS characterization for PM6, PM6-Cl<sub>0.5</sub>-*b*-D18-Cl<sub>0.5</sub>-TCl, PM6-Cl<sub>0.2</sub>-*b*-D18-Cl<sub>0.8</sub>-TCl, and PM6: PM6-Cl<sub>0.8</sub>-*b*-D18-Cl<sub>0.2</sub>-TCl pristine films (a, c, e, and g) and corresponding blend films (b, d, f, and h).

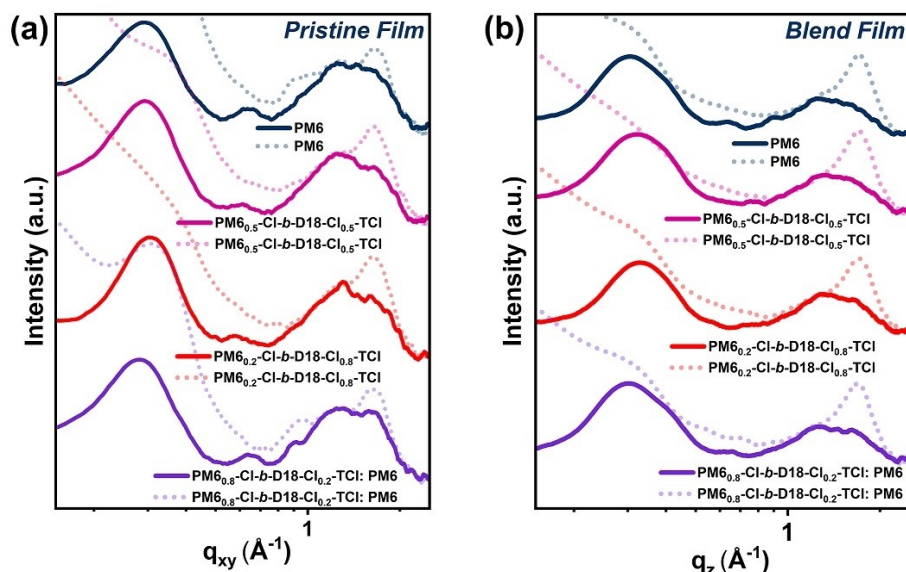

**Figure S27.** 1D GIWAXS characterization result of sequentially-block MCDs PM6, PM6-Cl<sub>0.5</sub>-*b*-D18-Cl<sub>0.5</sub>-TCl, PM6-Cl<sub>0.2</sub>-*b*-D18-Cl<sub>0.8</sub>-TCl, and PM6: PM6-Cl<sub>0.8</sub>-*b*-D18-Cl<sub>0.2</sub>-TCl in pristine (a) and blend (b) films.

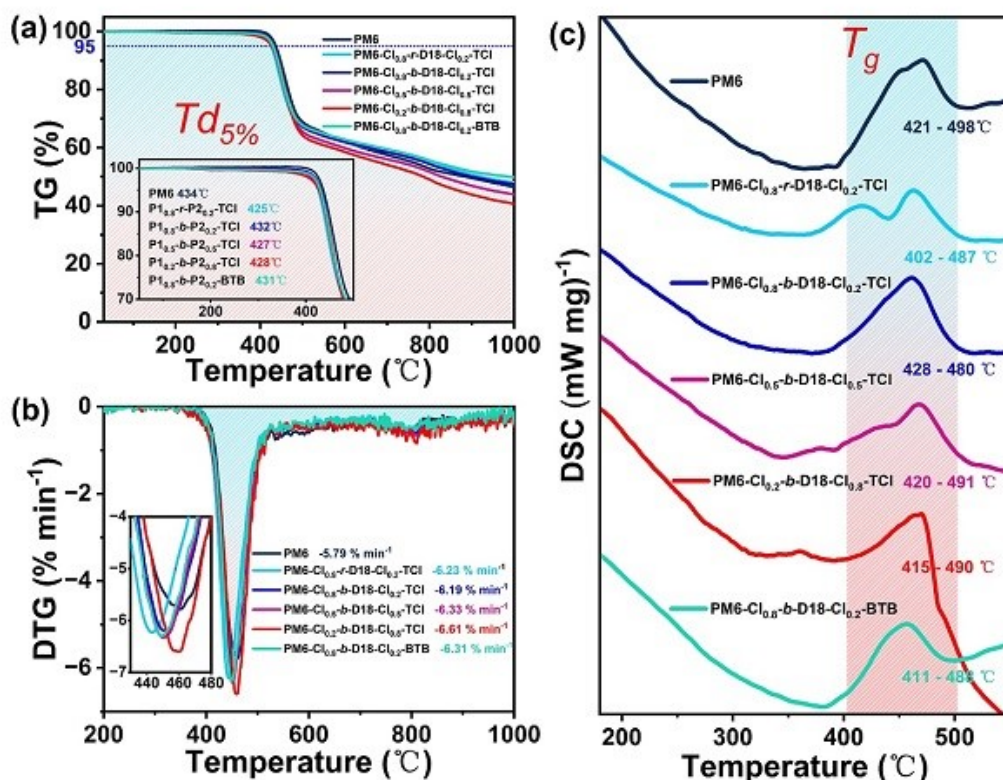

**Figure S28.** The thermo-gravimetric (TG) test for MCDs (a); the Derivative thermo-gravimetric (DTG) test for MCDs (b); the differential Scanning Calorimetry (DSC) test for MCDs (c).

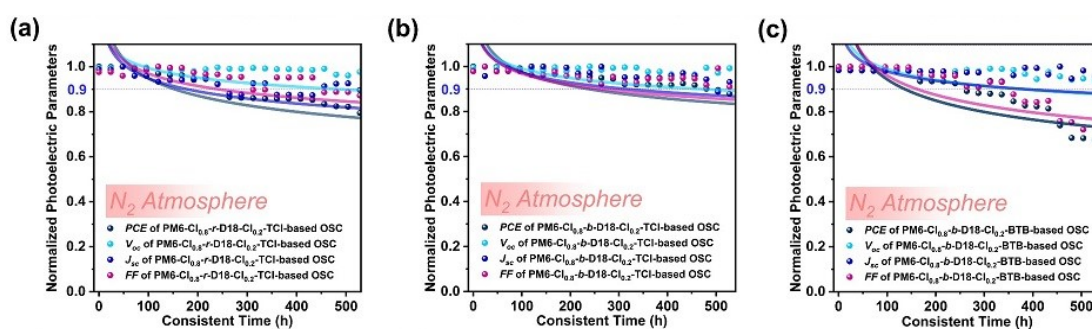

**Figure S29.** The detailed photoelectric stability of MCDs: BTP-eC9-based OSCs (a-c).

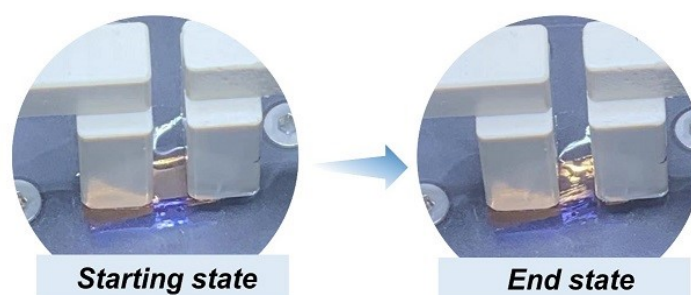

**Figure S30.** The pseudo free-standing tensile test in water.

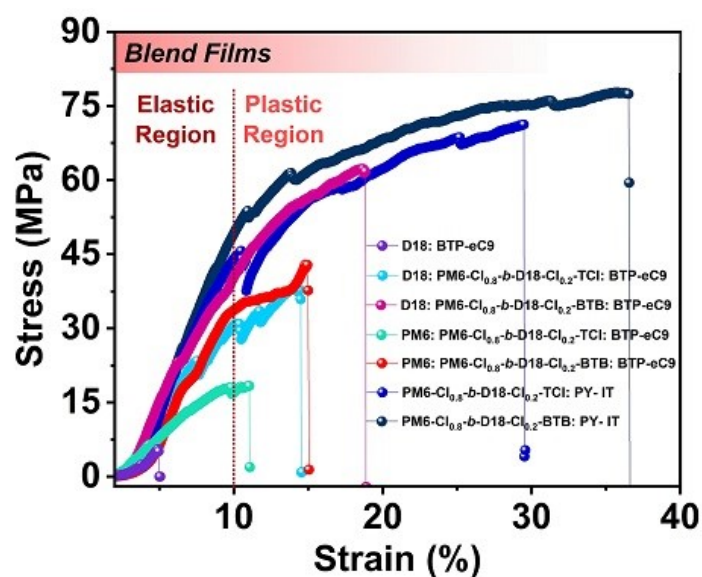

**Figure S31.** The pseudo-free-standing tensile test for blend films of D18: BTP-eC9, D18: PM6-Cl<sub>0.8</sub>-*b*-D18-Cl<sub>0.2</sub>-TCl, D18: PM6-Cl<sub>0.2</sub>-*b*-D18-Cl<sub>0.8</sub>-BTB, PM6: PM6-Cl<sub>0.8</sub>-*b*-D18-Cl<sub>0.2</sub>-TCl: BTP-eC9, PM6: PM6-Cl<sub>0.8</sub>-*b*-D18-Cl<sub>0.2</sub>-BTB: BTP-eC9, PM6-Cl<sub>0.8</sub>-*b*-D18-Cl<sub>0.2</sub>-TCl: PY-IT, and PM6-Cl<sub>0.8</sub>-*b*-D18-Cl<sub>0.2</sub>-BTB: PY-IT.

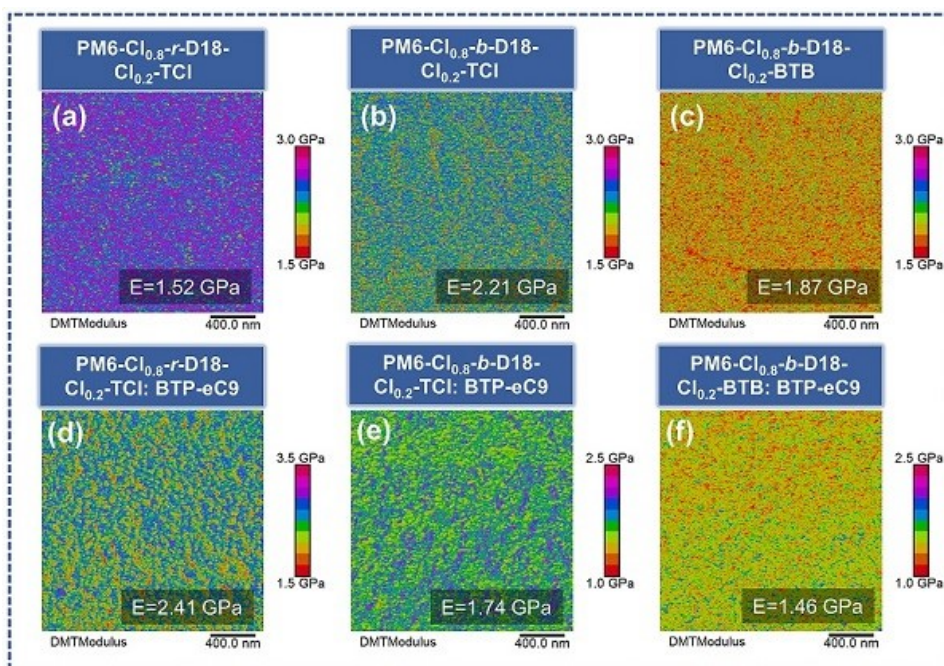

**Figure S32.** DMT modulus and adhesion of **PM6-Cl<sub>0.8</sub>-r-D18-Cl<sub>0.2</sub>-TCl**, **PM6-Cl<sub>0.8</sub>-b-D18-Cl<sub>0.2</sub>-TCl**, and **PM6-Cl<sub>0.8</sub>-b-D18-Cl<sub>0.2</sub>-BTB** pristine (a, b, and c) and blend (d, e, and f) films obtain by the PFQNM method, with the scanned area is  $2\ \mu\text{m} \times 2\ \mu\text{m}$ .

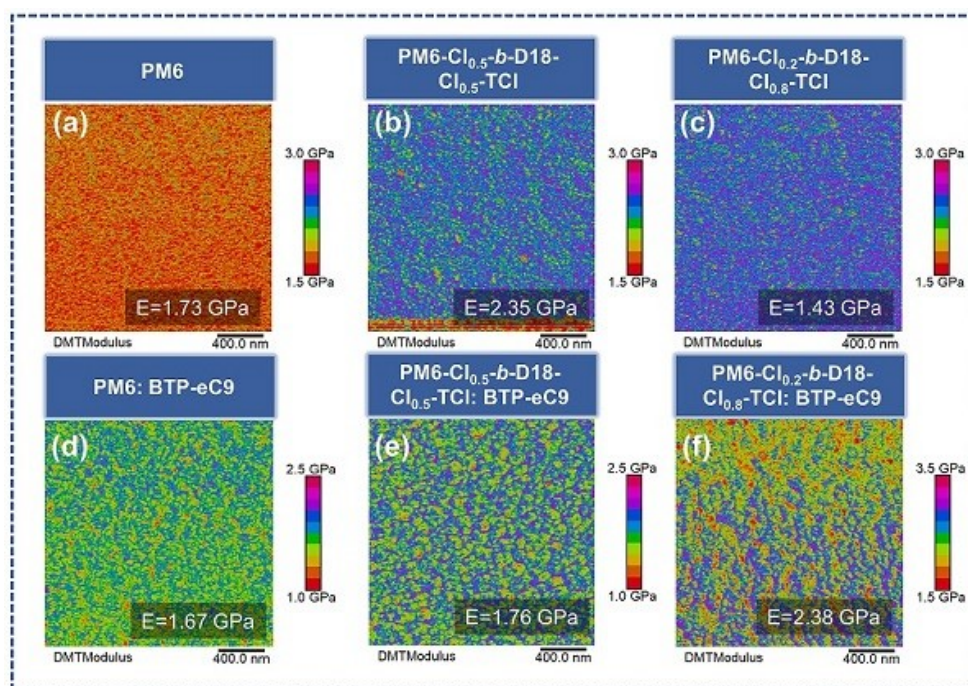

**Figure S33.** DMT modulus and adhesion of **PM6**, **PM6-Cl<sub>0.5</sub>-b-D18-Cl<sub>0.5</sub>-TCl**, and **PM6-Cl<sub>0.2</sub>-b-D18-Cl<sub>0.8</sub>-TCl** pristine (a, b, and c) and blend (d, e, and f) films obtain by the PFQNM

method, with the scanned area is  $2\ \mu\text{m} \times 2\ \mu\text{m}$ .

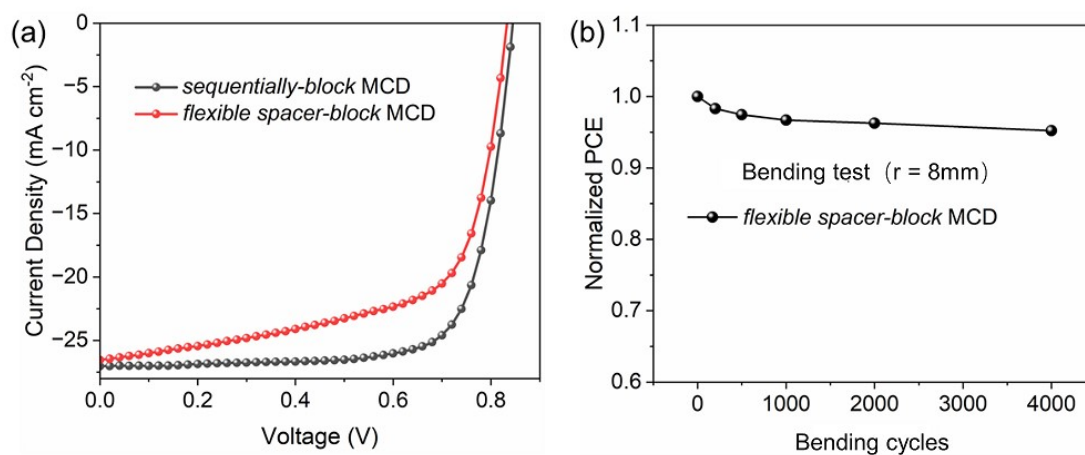

**Figure S34.** (a)  $J$ - $V$  characterization of **PM6-Cl<sub>0.8</sub>-*b*-D18-Cl<sub>0.2</sub>-TCl:BTP-eC9**-based and **PM6-Cl<sub>0.8</sub>-*b*-D18-Cl<sub>0.2</sub>-BTB:BTP-eC9**-based flexible OSCs. (b) Decays of normalized PCEs of flexible devices in a continuous bending test with the blending radius of 8 mm.

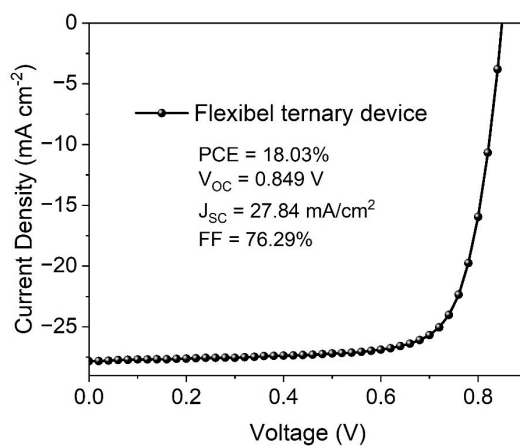

**Figure S35.**  $J$ - $V$  characterization of **PM6-Cl<sub>0.8</sub>-*b*-D18-Cl<sub>0.2</sub>-TCl: PM6: BTP-eC9**-based flexible ternary OSCs.



Batch Name: 20240914  
 Acquired: 2024/9/14 9:26:51

**Workbook Details**

Eluent: TCB stabilised with 0.0125% BHT  
 Column Set: PLgel MIXED-B LS 300x7.5mm x2  
 Detector: RI  
 Flow Rate: 1.00 ml/min  
 Temperature: 150  
 Injection Volume: 200.0 ul

**Analysis Using Method: 20240901**

Comments:

**Calibration Used: 2024/9/7 10:39:10**

High Limit MW RT: 10.95 mins  
 High Limit MW: 6217712  
 K: 17.5000

Low Limit MW RT: 17.27 mins  
 Low Limit MW: 623  
 Alpha: 0.6700

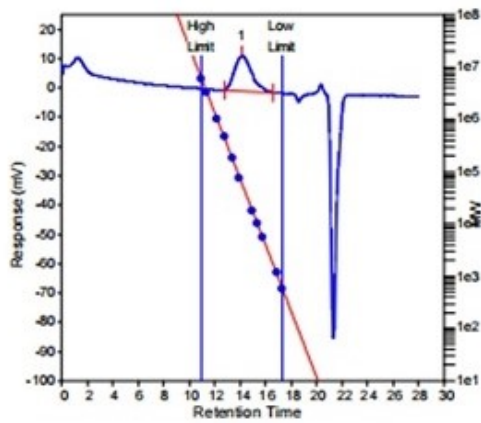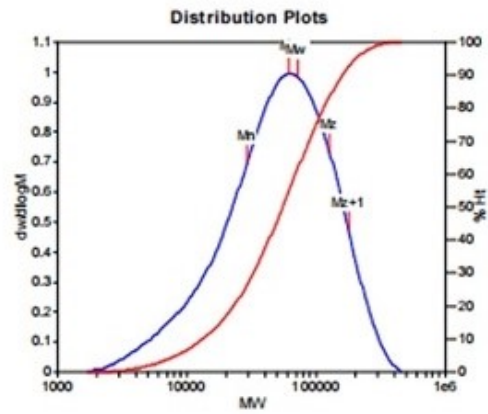

**MW Averages**

| Peak No | Mp    | Mn    | Mw    | Mz     | Mz+1   | Mv    | PD      |
|---------|-------|-------|-------|--------|--------|-------|---------|
| 1       | 61520 | 29159 | 72418 | 126206 | 177686 | 64659 | 2.48356 |

**Processed Peaks**

| Peak No | Name | Start RT (mins) | Max RT (mins) | End RT (mins) | Pk Height (mV) | % Height | Area (mV.secs) | % Area |
|---------|------|-----------------|---------------|---------------|----------------|----------|----------------|--------|
| 1       |      | 12.75           | 14.10         | 16.58         | 12.0374        | 0        | 1145.06        | 100    |

**Figure S36.** GPC characterization report of PM6.

Batch Name: 20240914  
 Acquired: 2024/9/14 12:02:25

**Workbook Details**

Eluent: TCB stabilised with 0.0125% BHT  
 Column Set: PLgel MIXED-B LS 300x7.5mm x2  
 Detector: RI  
 Flow Rate: 1.00 ml/min  
 Temperature: 150  
 Injection Volume: 200.0 ul

**Analysis Using Method: 20240901**

Comments:

**Calibration Used: 2024/9/7 10:39:10**

High Limit MW RT: 10.95 mins  
 High Limit MW: 6217712  
 K: 17.5000

Low Limit MW RT: 17.27 mins  
 Low Limit MW: 623  
 Alpha: 0.6700

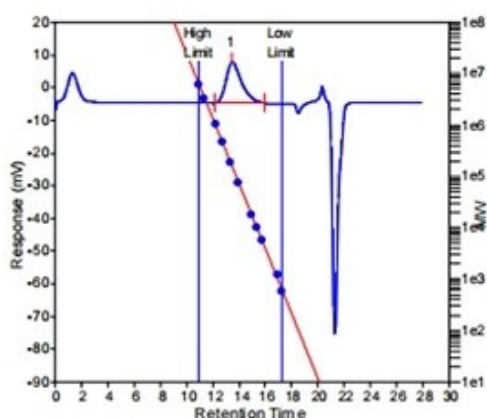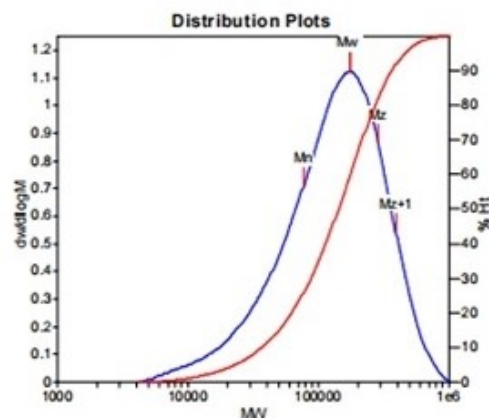

**MW Averages**

| Peak No | Mp     | Mn    | Mw     | Mz     | Mz+1   | Mv     | PD      |
|---------|--------|-------|--------|--------|--------|--------|---------|
| 1       | 174860 | 76704 | 175347 | 284602 | 389976 | 158958 | 2.28602 |

**Processed Peaks**

| Peak No | Name | Start RT (mins) | Max RT (mins) | End RT (mins) | Pk Height (mV) | % Height | Area (mV.secs) | % Area |
|---------|------|-----------------|---------------|---------------|----------------|----------|----------------|--------|
| 1       |      | 12.18           | 13.40         | 15.95         | 12.6626        | 0        | 1068.23        | 100    |

Figure S37. GPC characterization report of PM6-Cl<sub>0.8</sub>-r-D18-Cl<sub>0.2</sub>-TCl.

Batch Name: 20240914

Acquired: 2024/9/14 10:29:05

**Workbook Details**

Eluent: TCB stabilised with 0.0125% BHT

Column Set: PLgel MIXED-B LS 300x7.5mm x2

Detector: RI

Flow Rate: 1.00 mL/min

Temperature: 150

Injection Volume: 200.0 µl

**Analysis Using Method: 20240901**

Comments:

**Calibration Used: 2024/9/7 10:39:10**

High Limit MW RT: 10.95 mins

High Limit MW: 6217712

K: 17.5000

Low Limit MW RT: 17.27 mins

Low Limit MW: 623

Alpha: 0.6700

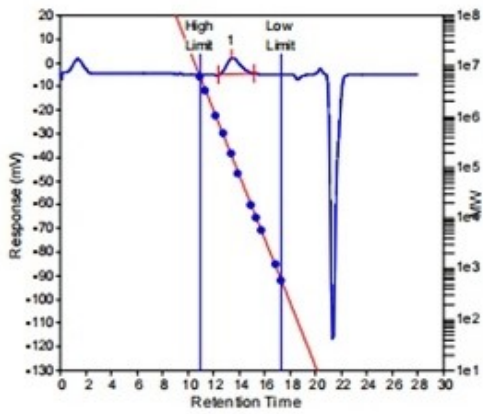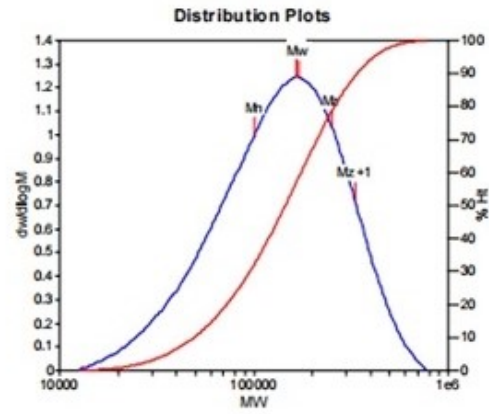

**MW Averages**

| Peak No | Mp     | Mn     | Mw     | Mz     | Mz+1   | Mv     | PD      |
|---------|--------|--------|--------|--------|--------|--------|---------|
| 1       | 166567 | 100450 | 171869 | 253531 | 331107 | 159454 | 1.71099 |

**Processed Peaks**

| Peak No | Name | Start RT (mins) | Max RT (mins) | End RT (mins) | Pk Height (mV) | % Height | Area (mV.secs) | % Area |
|---------|------|-----------------|---------------|---------------|----------------|----------|----------------|--------|
| 1       |      | 12.38           | 13.43         | 15.20         | 7.09777        | 0        | 539.072        | 100    |

**Figure S38.** GPC characterization report of PM6-Cl<sub>0.8</sub>-*b*-D18-Cl<sub>0.2</sub>-TCl.

Batch Name: 20240914  
 Acquired: 2024/9/14 9:57:58

**Workbook Details**

Eluent: TCB stabilised with 0.0125% BHT  
 Column Set: PLgel MIXED-B LS 300x7.5mm x2  
 Detector: RI  
 Flow Rate: 1.00 ml/min  
 Temperature: 150  
 Injection Volume: 200.0 ul

**Analysis Using Method: 20240901**

Comments:

**Calibration Used: 2024/9/7 10:39:10**

High Limit MW RT: 10.95 mins  
 High Limit MW: 6217712  
 K: 17.5000

Low Limit MW RT: 17.27 mins  
 Low Limit MW: 623  
 Alpha: 0.6700

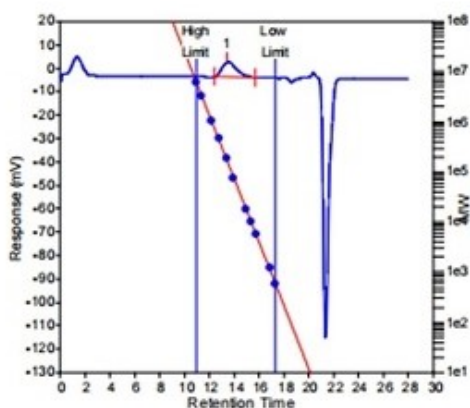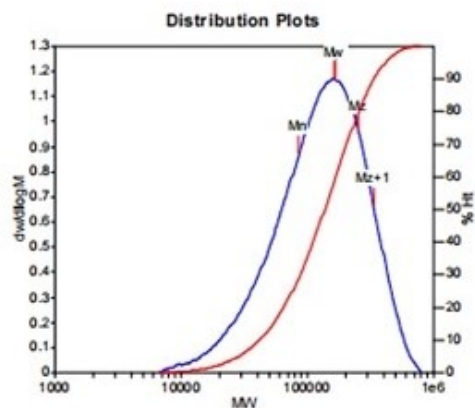

**MW Averages**

| Peak No | Mp     | Mn    | Mw     | Mz     | Mz+1   | Mv     | PD      |
|---------|--------|-------|--------|--------|--------|--------|---------|
| 1       | 162570 | 85926 | 165393 | 253444 | 335050 | 151955 | 1.92483 |

**Processed Peaks**

| Peak No | Name | Start RT (mins) | Max RT (mins) | End RT (mins) | Pk Height (mV) | % Height | Area (mV.secs) | % Area |
|---------|------|-----------------|---------------|---------------|----------------|----------|----------------|--------|
| 1       |      | 12.37           | 13.45         | 15.63         | 6.58915        | 0        | 533.18         | 100    |

**Figure S39.** GPC characterization report of PM6-Cl<sub>0.5</sub>-b-D18-Cl<sub>0.5</sub>-TCl.

Batch Name: 20240914  
 Acquired: 2024/9/14 11:00:12

**Workbook Details**

Eluent: TCB stabilised with 0.0125% BHT  
 Column Set: PLgel MIXED-B LS 300x7.5mm x2  
 Detector: RI  
 Flow Rate: 1.00 ml/min  
 Temperature: 150  
 Injection Volume: 200.0 ul

**Analysis Using Method: 20240901**

Comments:

**Calibration Used: 2024/9/7 10:39:10**

High Limit MW RT: 10.95 mins  
 High Limit MW: 6217712  
 K: 17.5000

Low Limit MW RT: 17.27 mins  
 Low Limit MW: 623  
 Alpha: 0.6700

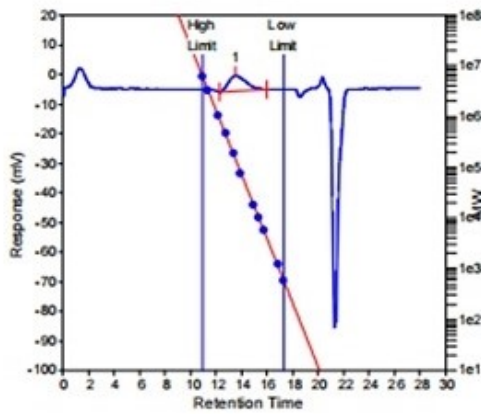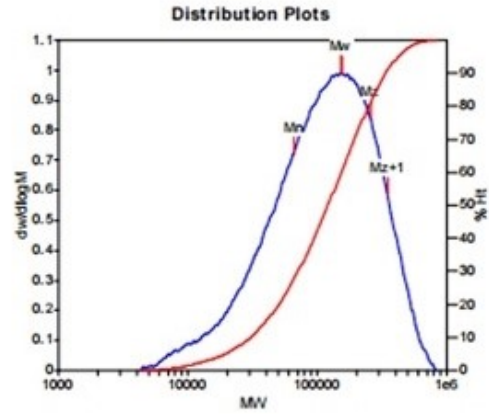

**MW Averages**

| Peak No | Mp     | Mn    | Mw     | Mz     | Mz+1   | Mv     | PD      |
|---------|--------|-------|--------|--------|--------|--------|---------|
| 1       | 151143 | 65104 | 154959 | 258527 | 349705 | 139331 | 2.38018 |

**Processed Peaks**

| Peak No | Name | Start RT (mins) | Max RT (mins) | End RT (mins) | Pk Height (mV) | % Height | Area (mV.secs) | % Area |
|---------|------|-----------------|---------------|---------------|----------------|----------|----------------|--------|
| 1       |      | 12.33           | 13.50         | 15.93         | 5.05396        | 0        | 483.603        | 100    |

**Figure S40.** GPC characterization report of PM6-Cl<sub>0,2</sub>-*b*-D18-Cl<sub>0,8</sub>-TCl.

Batch Name: 20240914  
 Acquired: 2024/9/14 12:33:31

**Workbook Details**

Eluent: TCB stabilised with 0.0125% BHT  
 Column Set: PLgel MIXED-B LS 300x7.5mm x2  
 Detector: RI  
 Flow Rate: 1.00 ml/min  
 Temperature: 150  
 Injection Volume: 200.0 ul

**Analysis Using Method: 20240901**

Comments:

**Calibration Used: 2024/9/7 10:39:10**

High Limit MW RT: 10.95 mins  
 High Limit MW: 6217712  
 K: 17.5000

Low Limit MW RT: 17.27 mins  
 Low Limit MW: 623  
 Alpha: 0.6700

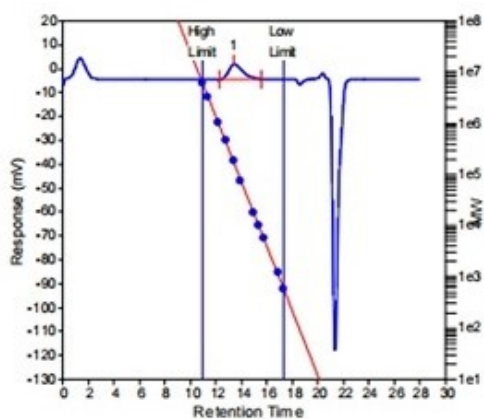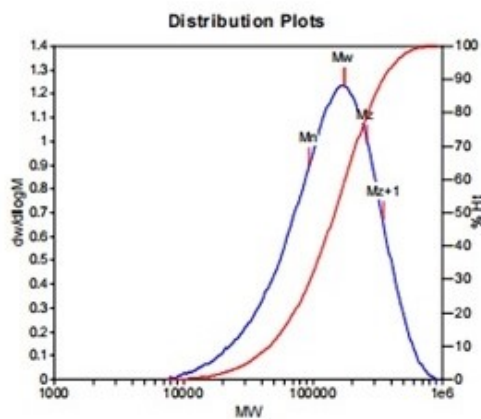

**MW Averages**

| Peak No | Mp     | Mn    | Mw     | Mz     | Mz+1   | Mv     | PD      |
|---------|--------|-------|--------|--------|--------|--------|---------|
| 1       | 174860 | 93474 | 174045 | 262500 | 347523 | 160566 | 1.86196 |

**Processed Peaks**

| Peak No | Name | Start RT (mins) | Max RT (mins) | End RT (mins) | Pk Height (mV) | % Height | Area (mV.secs) | % Area |
|---------|------|-----------------|---------------|---------------|----------------|----------|----------------|--------|
| 1       |      | 12.27           | 13.40         | 15.57         | 6.4993         | 0        | 498.193        | 100    |

**Figure S41.** GPC characterization report of PM6-Cl<sub>0.8</sub>-*b*-D18-Cl<sub>0.2</sub>-BTB.

**Table S1.** Detailed photoelectric and mechanical performance of reported MCD-based OSCs.

| Active layer                                       | Rigid   | Flexible | Mechanical             | Ref. <sup>(b)</sup> |
|----------------------------------------------------|---------|----------|------------------------|---------------------|
|                                                    | OSC     | OSC      | Performance            |                     |
|                                                    | PCE [%] | PCE [%]  | COS <sup>(a)</sup> [%] |                     |
| PBQx-TF: MYT                                       | 15.71   | 11.80    | 10.3                   | [1]                 |
| PBQx-TF: DTBT-C0                                   | 17.01   | 12.74    | 17.3                   | [1]                 |
| PBDB-T: PYBDT                                      | 12.37   | 13.81    | 11.7                   | [2]                 |
| PBDB-T: PYT8T                                      | 9.70    | 12.18    | 3.9                    | [2]                 |
| PBDB-T: PYFS-Ran                                   | 11.83   | 8.17     | 18.1                   | [2]                 |
| PBDB-T: PYFS-Reg                                   | 15.84   | 10.64    | 22.4                   | [2]                 |
| PBDB-T: PYSiO-0                                    | 9.57    | 8.75     | 9.6                    | [3]                 |
| PBDB-T: PYSiO-5                                    | 11.28   | (-)      | 13.9                   | [3]                 |
| PBDB-T: PYSiO-10                                   | 13.29   | 10.03    | 15.2                   | [3]                 |
| PBDB-T: PYSiO-20                                   | 11.75   | (-)      | 17.6                   | [3]                 |
| PBDB-T: PYSiO-30                                   | 10.48   | (-)      | 19.5                   | [3]                 |
| PBDB-T: PY-EH                                      | 10.25   | 8.2      | 11.15                  | [4]                 |
| PBDB-T: PY-SiO                                     | 11.48   | 9.8      | 18.32                  | [4]                 |
| D18: DYA-I                                         | 18.56   | (-)      | (-)                    | [5]                 |
| D18: DYA-IO                                        | 17.35   | (-)      | (-)                    | [5]                 |
| D18: DYA-O                                         | 16.27   | (-)      | (-)                    | [5]                 |
| PM6- <i>b</i> -PDMS <sub>5k</sub> : L8-BO          | 17.02   | 11.80    | 4.30                   | [6]                 |
| PM6- <i>b</i> -PDMS <sub>12k</sub> : L8-BO         | 17.93   | 11.19    | 8.13                   | [6]                 |
| PM6- <i>b</i> -PDMS <sub>19k</sub> : L8-BO         | 17.53   | 11.17    | 18.14                  | [6]                 |
| PhAm3: Y7                                          | 16.52   | (-)      | 10.4                   | [7]                 |
| PhAm5: Y7                                          | 17.28   | 12.21    | 13.8                   | [7]                 |
| PhAm10: Y7                                         | 15.80   | (-)      | 22.6                   | [7]                 |
| PM6-OEG3: BTP-eC9                                  | 16.91   | (-)      | 5.60                   | [8]                 |
| PM6-OEG5: BTP-eC9                                  | 17.34   | 11.78    | 10.50                  | [8]                 |
| PM6-OEG10: BTP-eC9                                 | 15.87   | (-)      | 12.05                  | [8]                 |
| PM6-OEG20: BTP-eC9                                 | 12.31   | (-)      | 7.66                   | [8]                 |
| D18: MYT                                           | 16.30   | 11.97    | 1.3                    | [9]                 |
| D18: DYT                                           | 17.14   | (-)      | (-)                    | [9]                 |
| D18: TYT-L                                         | 17.33   | 12.83    | 6.4                    | [9]                 |
| D18: TYT-S                                         | 18.48   | 14.37    | 21.6                   | [9]                 |
| D18 <sub>0.8-r</sub> -PEHDT <sub>0.2</sub> : L8-BO | 15.08   | 10.62    | 10.4                   | [10]                |

|                                                             |              |              |              |                  |
|-------------------------------------------------------------|--------------|--------------|--------------|------------------|
| D18 <sub>0.8-s</sub> -PEHDT <sub>0.2</sub> : L8-BO          | 18.73        | 14.02        | 17.2         | [10]             |
| PBDB-T: PYTS-0.0                                            | 12.82        | 12.82        | (-)          | [11]             |
| PBDB-T: PYTS-0.1                                            | 14.04        | 14.04        | (-)          | [11]             |
| PBDB-T: PYTS-0.3                                            | 14.35        | 14.35        | (-)          | [11]             |
| PBDB-T: PYTS-0.5                                            | 7.68         | 7.68         | (-)          | [11]             |
| PBDB-T: PYTS-1.0                                            | 1.64         | 1.64         | (-)          | [11]             |
| P1 <sub>0.8</sub> /P2 <sub>0.2</sub> : Y6                   | 16.95        | 15.66        | 8.01         | [12]             |
| P1 <sub>0.8</sub> /P2 <sub>0.2</sub> -TCl: Y6               | 18.15        | 17.03        | 9.09         | [12]             |
| P1 <sub>0.7</sub> /P2 <sub>0.3</sub> -TCl: Y6               | 17.40        | (-)          | 9.15         | [12]             |
| P1 <sub>0.6</sub> /P2 <sub>0.4</sub> -TCl: Y6               | 17.18        | (-)          | 12.3         | [12]             |
| <b>PM6</b>                                                  | <b>18.44</b> | <b>(-)</b>   | <b>4.6</b>   | <b>This work</b> |
| <b>PM6-Cl<sub>0.8-r</sub>-D18-Cl<sub>0.2</sub>-TCl</b>      | <b>17.07</b> | <b>(-)</b>   | <b>10.11</b> | <b>This work</b> |
| <b>PM6-Cl<sub>0.8-b</sub>-D18-Cl<sub>0.2</sub>-TCl</b>      | <b>18.55</b> | <b>17.21</b> | <b>22.58</b> | <b>This work</b> |
| <b>PM6-Cl<sub>0.5-b</sub>-D18-Cl<sub>0.5</sub>-TCl</b>      | <b>17.58</b> | <b>(-)</b>   | <b>17.75</b> | <b>This work</b> |
| <b>PM6-Cl<sub>0.2-b</sub>-D18-Cl<sub>0.8</sub>-TCl</b>      | <b>17.25</b> | <b>(-)</b>   | <b>16.71</b> | <b>This work</b> |
| <b>PM6-Cl<sub>0.8-b</sub>-D18-Cl<sub>0.2</sub>-BTB</b>      | <b>15.07</b> | <b>14.36</b> | <b>25.38</b> | <b>This work</b> |
| <b>PM6-Cl<sub>0.8-b</sub>-D18-Cl<sub>0.2</sub>-TCl: PM6</b> | <b>19.57</b> | <b>18.03</b> | <b>11.03</b> | <b>This work</b> |

\*(a) The fracture strain value of blend films tested based on pseudo-free-standing tensile test on water.



**Table S2.** detailed photovoltaic performance in photovoltaic devices fabricated by MCDs.

| MCD              | Acceptor            | $V_{oc}$<br>[V] | $J_{sc}$<br>[mA/cm] | $FF$<br>[%] | PCE<br>[%] | Ref. |
|------------------|---------------------|-----------------|---------------------|-------------|------------|------|
| PBDT-TPD-5       | PNDI-T-5            | 0.79            | 2.7                 | 46.1        | 0.98       | [13] |
| PBDT-TPD-10      | PNDO-T-5            | 0.8             | 5.5                 | 51.3        | 2.26       | [13] |
| PBDT-TPD-8       | PNDI-T-5            | 0.81            | 7.6                 | 54.3        | 3.34       | [13] |
| PBDT-TPD-DPP20 % | PC <sub>71</sub> BM | 0.81            | 2.35                | 63          | 1.2        | [14] |
| PBDT-TPD-DPP40 % | PC <sub>71</sub> BM | 0.67            | 5.02                | 53          | 1.78       | [14] |
| PBDB-TBT4        | ITIC                | 0.9             | 4.12                | 56.8        | 2.12       | [15] |
| PBDB-TBT3        | ITIC                | 0.91            | 11.45               | 56.91       | 5.93       | [15] |
| PBDB-TBT2        | ITIC                | 0.88            | 15.5                | 58.26       | 7.95       | [15] |
| PBDB-TBT1        | ITIC                | 0.86            | 16.84               | 62.85       | 9.09       | [15] |
| P1               | PC <sub>61</sub> BM | 0.72            | 6.16                | 49          | 2.16       | [16] |
| P2               | PC <sub>61</sub> BM | 0.74            | 12.21               | 46          | 4.17       | [16] |
| P3               | PC <sub>61</sub> BM | 0.78            | 14.13               | 48          | 5.29       | [16] |
| P3               | PC <sub>70</sub> BM | 0.71            | 6.41                | 51.7        | 2.35       | [17] |
| P(BDT-TBTF/DPP)  | PC <sub>70</sub> BM | 0.74            | 13.15               | 36          | 3.22       | [18] |
| PBDTBD-25        | IT-4F               | 0.83            | 11.96               | 42.16       | 3.99       | [19] |
| PBDTBD-75        | IT-4F               | 0.75            | 17.89               | 70.7        | 9.14       | [19] |
| PBDTBD-50        | IT-4F               | 0.8             | 17.16               | 73.1        | 9.7        | [19] |
| P2FBT-50         | PC <sub>71</sub> BM | 0.89            | 9.53                | 52          | 4.36       | [20] |
| P2FBT-25         | PC <sub>71</sub> BM | 0.89            | 10.52               | 54          | 4.95       | [20] |
| P2FBT-75         | PC <sub>71</sub> BM | 0.89            | 11.39               | 56          | 5.33       | [20] |
| P4               | PC <sub>71</sub> BM | 0.81            | 10.3                | 60          | 5.01       | [21] |
| P6(0.1:0.9)      | PC <sub>71</sub> BM | 0.71            | 13.65               | 61.1        | 5.74       | [22] |
| P5(0.3:0.7)      | PC <sub>71</sub> BM | 0.71            | 15.52               | 61.3        | 6.45       | [22] |
| P2(0.9:0.1)      | PC <sub>71</sub> BM | 0.74            | 14.7                | 64.4        | 6.72       | [22] |
| P4(0.5:0.5)      | PC <sub>71</sub> BM | 0.72            | 18.52               | 62.2        | 8.01       | [22] |
| P3(0.7:0.3)      | PC <sub>71</sub> BM | 0.73            | 18.45               | 66.9        | 8.8        | [22] |
| LGC-D013         | PC <sub>71</sub> BM | 0.87            | 11.29               | 73.13       | 6.99       | [23] |
| [7-3]            | PC <sub>71</sub> BM | 0.669           | 16.8                | 60.7        | 7.05       | [24] |
| [1-1]            | PC <sub>71</sub> BM | 0.664           | 18.4                | 65          | 8.1        | [24] |
| [3-7]            | PC <sub>71</sub> BM | 0.681           | 19.1                | 65.2        | 9.18       | [24] |
| Ph75             | ITIC                | 0.89            | 15.45               | 56.08       | 7.58       | [25] |
| Ph25             | ITIC                | 0.86            | 16.11               | 59.44       | 8.14       | [25] |
| Ph50             | ITIC                | 0.87            | 15.87               | 61.97       | 8.43       | [25] |
| P2(2019)         | PC <sub>71</sub> BM | 0.82            | 14.07               | 66          | 7.61       | [26] |
| P4(2019)         | PC <sub>71</sub> BM | 0.74            | 16.65               | 65          | 8          | [26] |
| P3(2019)         | PC <sub>71</sub> BM | 0.76            | 17.21               | 71          | 9.13       | [26] |
| PBTTFB           | PC <sub>71</sub> BM | 0.88            | 14.51               | 65          | 7.78       | [27] |
| P12(2019)        | PC <sub>71</sub> BM | 0.83            | 14.36               | 66          | 7.81       | [28] |
| P14(2019)        | PC <sub>71</sub> BM | 0.88            | 14.78               | 66          | 8.53       | [28] |
| P13(2019)        | PC <sub>71</sub> BM | 0.86            | 15.74               | 68          | 9.13       | [28] |
| 3MTT             | ITIC                | 1               | 15.67               | 51.47       | 8.04       | [29] |
| 3MTB             | ITIC                | 0.92            | 16.34               | 54.9        | 8.27       | [29] |

|                                                        |                |              |              |              |              |                  |
|--------------------------------------------------------|----------------|--------------|--------------|--------------|--------------|------------------|
| J52-TBF80                                              | ITIC           | 0.756        | 16.76        | 66.6         | 8.3          | [30]             |
| J52-TBF20                                              | ITIC           | 0.803        | 17.68        | 70.5         | 9.92         | [30]             |
| J52-TBF50                                              | ITIC           | 0.79         | 17.93        | 72.8         | 10.18        | [30]             |
| P2(2020)                                               | ITIC           | 0.925        | 15.9         | 57.2         | 8.41         | [31]             |
| P3(2020)                                               | ITIC           | 0.913        | 16.87        | 59.2         | 9.12         | [31]             |
| P1(2020)                                               | ITIC           | 0.946        | 15.94        | 57.2         | 8.62         | [31]             |
| D7A                                                    | ITIC           | 0.88         | 16.71        | 62           | 8.88         | [32]             |
| D3A                                                    | ITIC           | 0.87         | 16.58        | 65           | 9.12         | [32]             |
| D5A                                                    | ITIC           | 0.89         | 17.24        | 67           | 10.12        | [32]             |
| E18                                                    | BTA3-4F        | 1.3          | 10.95        | 68.66        | 9.89         | [33]             |
| P75                                                    | Y6             | 0.81         | 22.6         | 58           | 10.28        | [34]             |
| PCE10-BDT2Cl-0.3                                       | Y6             | 0.7          | 23.56        | 66.24        | 10.77        | [35]             |
| PCE10-BDT2F-0.3                                        | Y6             | 0.678        | 26.1         | 66.56        | 11.55        | [35]             |
| PCE10-BDT2Cl-0.5                                       | Y6             | 0.724        | 23.37        | 64.41        | 11.62        | [35]             |
| PCE10-BDT2Cl-0.7                                       | Y6             | 0.743        | 24.85        | 65.58        | 11.93        | [35]             |
| PCE10-BDT2F-0.6                                        | Y6             | 0.739        | 26.01        | 64.08        | 12.3         | [35]             |
| PCE10-BDT2F-0.5                                        | Y6             | 0.72         | 26.01        | 69.42        | 12.78        | [35]             |
| PCE10-BDT2F-0.9                                        | Y6             | 0.766        | 25.14        | 67.71        | 12.89        | [35]             |
| PCE10-BDT2F-0.7                                        | Y6             | 0.746        | 26.17        | 68.95        | 13.39        | [35]             |
| PCE10-BDT2F-0.8                                        | Y6             | 0.753        | 26.36        | 69.45        | 13.66        | [35]             |
| PBDB-Th2Cl15                                           | Y6             | 0.87         | 24.93        | 58.1         | 12.22        | [36]             |
| PBDB-Th15                                              | Y6             | 0.83         | 24.8         | 72.33        | 14.54        | [36]             |
| PBDB-ThCl15                                            | Y6             | 0.84         | 25.21        | 74.03        | 15.42        | [36]             |
| PBDB-T-2F(3/4)                                         | Y6-HU          | 0.86         | 23.78        | 70           | 13.62        | [37]             |
| PM2(X:Y=1:1)                                           | Y6             | 0.9          | 24.9         | 69           | 15.2         | [38]             |
| PM1(X:Y=4:1)                                           | Y6             | 0.87         | 25.9         | 78           | 17.3         | [38]             |
| PM6-TZ40 (n: m = 60:40)                                | Y6             | 0.85         | 24.8         | 72           | 15.3         | [39]             |
| PM6-TZ20 (n: m = 80:20)                                | Y6             | 0.86         | 26.2         | 75           | 17.3         | [39]             |
| PM6-T-C12                                              | Y6             | 0.843        | 25.97        | 73.02        | 15.98        | [40]             |
| PM6-T-C6                                               | Y6             | 0.847        | 26.07        | 73.53        | 16.23        | [40]             |
| PM6-T-C1                                               | Y6             | 0.847        | 25.89        | 75.44        | 16.54        | [40]             |
| PM6-T                                                  | Y6             | 0.85         | 26           | 77.4         | 17.11        | [40]             |
| D18-40%Cl                                              | Y6             | 0.866        | 26.34        | 75.46        | 17.05        | [41]             |
| D18-20%Cl                                              | Y6             | 0.861        | 27.2         | 78.06        | 18.12        | [41]             |
| PMD-5                                                  | L8-BO          | 0.892        | 25.16        | 76.61        | 17.19        | [42]             |
| PMD-20                                                 | L8-BO          | 0.907        | 25.53        | 76.14        | 17.26        | [42]             |
| PMD-10                                                 | L8-BO          | 0.895        | 25.44        | 76.72        | 17.47        | [42]             |
| PMD-15                                                 | L8-BO          | 0.899        | 25.64        | 77.01        | 17.75        | [42]             |
| PM6TPO                                                 | Y6             | 0.843        | 26.35        | 77.68        | 17.26        | [43]             |
| <b>PM6</b>                                             | <b>BTP-eC9</b> | <b>0.846</b> | <b>28.22</b> | <b>77.19</b> | <b>18.44</b> | <b>This work</b> |
| <b>PM6-Cl<sub>0.8-r</sub>-D18-Cl<sub>0.2</sub>-TC1</b> | <b>BTP-eC9</b> | <b>0.853</b> | <b>27.4</b>  | <b>73.04</b> | <b>17.07</b> | <b>This Work</b> |
| <b>PM6-Cl<sub>0.8-b</sub>-D18-Cl<sub>0.2</sub>-TC1</b> | <b>BTP-eC9</b> | <b>0.854</b> | <b>28.24</b> | <b>76.96</b> | <b>18.55</b> | <b>This Work</b> |
| <b>PM6-Cl<sub>0.5-b</sub>-D18-Cl<sub>0.5</sub>-TC1</b> | <b>BTP-eC9</b> | <b>0.860</b> | <b>27.54</b> | <b>74.22</b> | <b>17.58</b> | <b>This Work</b> |
| <b>PM6-Cl<sub>0.2-b</sub>-D18-Cl<sub>0.8</sub>-TC1</b> | <b>BTP-eC9</b> | <b>0.861</b> | <b>27.31</b> | <b>73.40</b> | <b>17.25</b> | <b>This work</b> |
| <b>PM6-Cl<sub>0.8-b</sub>-D18-Cl<sub>0.2</sub>-BTB</b> | <b>BTP-eC9</b> | <b>0.836</b> | <b>26.94</b> | <b>66.88</b> | <b>15.07</b> | <b>This Work</b> |

|                                                                      |         |       |       |       |       |           |
|----------------------------------------------------------------------|---------|-------|-------|-------|-------|-----------|
| PM6-Cl <sub>0.8</sub> - <i>b</i> -D18-Cl <sub>0.2</sub> -TCl:<br>PM6 | BTP-eC9 | 0.864 | 28.86 | 78.40 | 19.57 | This Work |
|----------------------------------------------------------------------|---------|-------|-------|-------|-------|-----------|

**Table S3.** Monomer reactivity for electronic active blocks **D18-Cl (BTz unit)** and **PM6-Cl (BDD unit)** in *sequentially-block* MCDs.

| Ratio of BDD unit: BTz unit<br>[%] | $M_n$<br>[kDa] | $M_w$<br>[kDa] |
|------------------------------------|----------------|----------------|
| <b>80: 20</b>                      | 100.4          | 171.9          |
| <b>50: 50</b>                      | 85.9           | 165.4          |
| <b>20: 80</b>                      | 65.1           | 154.9          |

**Table S4.** Detailed Photovoltaic parameters of MCDs and acceptor.

| Materials                                                    | $\lambda_{max,s}^{(a)}$<br>[nm] | $\lambda_{max,f}^{(b)}$<br>[nm] | $\lambda_{onset,f}^{(c)}$<br>[nm] | $HOMO^{(d)}$<br>[eV] | $LUMO^{(d)}$<br>[eV] | $Eg^{cv(e)}$<br>[eV] |
|--------------------------------------------------------------|---------------------------------|---------------------------------|-----------------------------------|----------------------|----------------------|----------------------|
| BTP-eC9                                                      | (-)                             | (-)                             | (-)                               | -5.78                | -3.79                | 1.99                 |
| PM6                                                          | 614                             | 617                             | 684                               | -5.63                | -3.44                | 2.19                 |
| PM6-Cl <sub>0.8</sub> - <i>r</i> -D18-Cl <sub>0.2</sub> -TCl | 570                             | 571                             | 688                               | -5.70                | -3.53                | 2.17                 |
| PM6-Cl <sub>0.8</sub> - <i>b</i> -D18-Cl <sub>0.2</sub> -TCl | 575                             | 577                             | 681                               | -5.71                | -3.52                | 2.22                 |
| PM6-Cl <sub>0.5</sub> - <i>b</i> -D18-Cl <sub>0.5</sub> -TCl | 573                             | 574                             | 677                               | -5.76                | -3.50                | 2.26                 |
| PM6-Cl <sub>0.2</sub> - <i>b</i> -D18-Cl <sub>0.8</sub> -TCl | 570                             | 573                             | 651                               | -5.82                | -3.54                | 2.28                 |
| PM6-Cl <sub>0.8</sub> - <i>b</i> -D18-Cl <sub>0.2</sub> -BTB | 572                             | 572                             | 683                               | -5.50                | -3.39                | 2.11                 |

\*(a) the maximum absorption wavelength of donors in solution;

(b) the maximum absorption wavelength of donors in film;

(c) the onset absorption wavelength of donors in film;

(d) calculations based on DFT theory at **B3LYP/6-31G (d, p)** level;

(e)  $Eg^{cv} = E_{HOMO} - E_{LUMO}$ .

**Table S5.** Elemental analysis characterization result of “C”, “N”, “H”, “S”, and “O”.

| Blend film                                             | Theoretical elemental content |                  |                  |                  |                  | Tested elemental content |      |                  |       |                  |
|--------------------------------------------------------|-------------------------------|------------------|------------------|------------------|------------------|--------------------------|------|------------------|-------|------------------|
|                                                        | C <sup>(a)</sup>              | N <sup>(a)</sup> | H <sup>(a)</sup> | S <sup>(a)</sup> | O <sup>(a)</sup> | C                        | N    | H <sup>(b)</sup> | S     | O <sup>(b)</sup> |
|                                                        | [%]                           | [%]              | [%]              | [%]              | [%]              | [%]                      | [%]  | [%]              | [%]   | [%]              |
| <b>PM6</b>                                             | 67.27                         | 0                | 6.61             | 20.52            | 2.56             | 67.31                    | 0.46 | 6.51             | 21.13 | 3.59             |
| <b>PM6-Cl<sub>0.8-r</sub>-D18-Cl<sub>0.2</sub>-TCI</b> | 65.30                         | 0.44             | 6.27             | 20.48            | 1.99             | 65.38                    | 0.72 | 6.28             | 20.50 | 2.8              |
| <b>PM6-Cl<sub>0.8-b</sub>-D18-Cl<sub>0.2</sub>-TCI</b> | 65.30                         | 0.44             | 6.27             | 20.48            | 1.99             | 65.25                    | 0.76 | 6.15             | 20.56 | 2.83             |
| <b>PM6-Cl<sub>0.5-b</sub>-D18-Cl<sub>0.5</sub>-TCI</b> | 65.40                         | 1.06             | 6.43             | 20.55            | 1.21             | 65.81                    | 1.32 | 6.34             | 20.88 | 2.69             |
| <b>PM6-Cl<sub>0.2-b</sub>-D18-Cl<sub>0.8</sub>-TCI</b> | 65.50                         | 1.64             | 6.59             | 20.62            | 0.47             | 65.63                    | 1.94 | 6.56             | 21.22 | 1.76             |
| <b>PM6-Cl<sub>0.8-b</sub>-D18-Cl<sub>0.2</sub>-BTB</b> | 64.70                         | 1.00             | 6.37             | 21.73            | 1.14             | 65.44                    | 0.81 | 6.60             | 21.36 | 0.99             |

\*<sup>(a)</sup> calculated based on ideal copolymer molecular structure.

<sup>(b)</sup> The high content of hydrogen and oxygen elements is related to the moisture content in the air, so try to keep the sample dry as much as possible.

**Table S6.** Detailed photoelectric parameters for MCD-based OSCs with hole transport layer (HTL) **PEDOT: PSS 4083**.

| MCD                                                         | Acceptor | D/A <sup>(a)</sup> | $V_{oc}$<br>[V] | $J_{sc}$<br>[mA cm <sup>-2</sup> ] | $FF$<br>[%] | PCE<br>[%] |
|-------------------------------------------------------------|----------|--------------------|-----------------|------------------------------------|-------------|------------|
| <b>PM6</b>                                                  | BTP-eC9  | 1: 1.2             | 0.837           | 27.39                              | 74.40       | 17.06      |
| <b>PM6-Cl<sub>0.8-r</sub>-D18-Cl<sub>0.2</sub>-TCI</b>      | BTP-eC9  | 1: 1.2             | 0.859           | 25.67                              | 72.78       | 16.05      |
| <b>PM6-Cl<sub>0.8-b</sub>-D18-Cl<sub>0.2</sub>-TCI</b>      | BTP-eC9  | 1: 1.2             | 0.863           | 27.50                              | 72.16       | 17.15      |
| <b>PM6-Cl<sub>0.5-b</sub>-D18-Cl<sub>0.5</sub>-TCI</b>      | BTP-eC9  | 1: 1.2             | 0.865           | 26.39                              | 74.38       | 16.97      |
| <b>PM6-Cl<sub>0.2-b</sub>-D18-Cl<sub>0.8</sub>-TCI</b>      | BTP-eC9  | 1: 1.2             | 0.875           | 25.42                              | 68.71       | 15.29      |
| <b>PM6-Cl<sub>0.8-b</sub>-D18-Cl<sub>0.2</sub>-BTB</b>      | BTP-eC9  | 1: 1.2             | 0.841           | 26.29                              | 67.44       | 14.90      |
| <b>PM6-Cl<sub>0.8-b</sub>-D18-Cl<sub>0.2</sub>-TCI: PM6</b> | BTP-eC9  | 0.1: 0.9: 1.2      | 0.865           | 27.53                              | 72.21       | 17.20      |

\*<sup>(a)</sup> The weight ratio of MCD to acceptor.

**Table S7.** Detailed photoelectric performance based on MCD-based OSCs.

| MCD                                                         | P (E, T)<br>[%] | $\alpha$<br>[%] | S<br>[kT q <sup>-1</sup> ] | $\mu_h$<br>[cm <sup>2</sup> Vs <sup>-1</sup> ] | $\mu_e$<br>[cm <sup>2</sup> Vs <sup>-1</sup> ] | $\mu_h/\mu_e$<br>[%] |
|-------------------------------------------------------------|-----------------|-----------------|----------------------------|------------------------------------------------|------------------------------------------------|----------------------|
| <b>PM6</b>                                                  | 0.993           | 99.3            | 1.19                       | 3.28×10 <sup>-3</sup>                          | 5.18×10 <sup>-3</sup>                          | 63.3                 |
| <b>PM6-Cl<sub>0.8-r</sub>-D18-Cl<sub>0.2</sub>-TCI</b>      | 0.986           | 98.7            | 1.24                       | 2.84×10 <sup>-3</sup>                          | 4.74×10 <sup>-3</sup>                          | 60.0                 |
| <b>PM6-Cl<sub>0.8-b</sub>-D18-Cl<sub>0.2</sub>-TCI</b>      | 0.994           | 99.5            | 1.19                       | 3.15×10 <sup>-3</sup>                          | 4.94×10 <sup>-3</sup>                          | 63.8                 |
| <b>PM6-Cl<sub>0.5-b</sub>-D18-Cl<sub>0.5</sub>-TCI</b>      | 0.991           | 99.2            | 1.20                       | 3.04×10 <sup>-3</sup>                          | 4.86×10 <sup>-3</sup>                          | 62.6                 |
| <b>PM6-Cl<sub>0.2-b</sub>-D18-Cl<sub>0.8</sub>-TCI</b>      | 0.990           | 99.0            | 1.23                       | 2.87×10 <sup>-3</sup>                          | 4.70×10 <sup>-3</sup>                          | 61.1                 |
| <b>PM6-Cl<sub>0.8-b</sub>-D18-Cl<sub>0.2</sub>-BTB</b>      | 0.971           | 97.4            | 1.30                       | 1.87×10 <sup>-3</sup>                          | 3.20×10 <sup>-3</sup>                          | 58.4                 |
| <b>PM6-Cl<sub>0.8-b</sub>-D18-Cl<sub>0.2</sub>-TCI: PM6</b> | 0.997           | 99.7            | 1.15                       | 3.62×10 <sup>-3</sup>                          | 5.33×10 <sup>-3</sup>                          | 67.9                 |

**Table S8.** Detailed morphology parameters in MCD pristine and blend films.

| Active Layer                                                         | $\theta_{\text{H}_2\text{O}}^{(a)}$<br>[°] | $\theta_{\text{CH}_2\text{I}_2}^{(b)}$<br>[°] | $\gamma^d$<br>[mN m <sup>-1</sup> ] | $\gamma^p$<br>[mN m <sup>-1</sup> ] | Surface<br>tension<br>[mN m <sup>-1</sup> ] | $\chi^{(c)}$ | Ra <sup>(d)</sup><br>[nm] |
|----------------------------------------------------------------------|--------------------------------------------|-----------------------------------------------|-------------------------------------|-------------------------------------|---------------------------------------------|--------------|---------------------------|
| <b>PM6</b>                                                           | 102.80                                     | 58.19                                         | 30.052                              | 0.162                               | 30.214                                      | 1.282        | 0.790                     |
| <b>PM6-Cl<sub>0.8-r</sub>-D18-Cl<sub>0.2</sub>-TCI</b>               | 102.88                                     | 58.06                                         | 30.215                              | 0.135                               | 30.349                                      | 1.254        | 0.674                     |
| <b>PM6-Cl<sub>0.8-b</sub>-D18-Cl<sub>0.2</sub>-TCI</b>               | 103.21                                     | 57.30                                         | 30.822                              | 0.092                               | 30.913                                      | 1.143        | 0.685                     |
| <b>PM6-Cl<sub>0.5-b</sub>-D18-Cl<sub>0.5</sub>-TCI</b>               | 102.37                                     | 58.10                                         | 30.064                              | 0.177                               | 30.240                                      | 1.276        | 0.689                     |
| <b>PM6-Cl<sub>0.2-b</sub>-D18-Cl<sub>0.8</sub>-TCI</b>               | 102.09                                     | 60.04                                         | 28.658                              | 0.280                               | 28.939                                      | 1.561        | 0.768                     |
| <b>PM6-Cl<sub>0.8-b</sub>-D18-Cl<sub>0.2</sub>-BTB</b>               | 103.45                                     | 60.50                                         | 28.662                              | 0.169                               | 28.831                                      | 1.586        | 1.18                      |
| <b>P1<sub>0.8-b</sub>-P2<sub>0.2</sub>-TCI: PM6</b>                  | 102.79                                     | 57.42                                         | 30.636                              | 0.122                               | 30.758                                      | 1.173        | 0.616                     |
| <b>PM6: BTP-eC9</b>                                                  | 102.13                                     | 59.98                                         | 28.709                              | 0.273                               | 28.982                                      | (-)          | 1.26                      |
| <b>PM6-Cl<sub>0.8-r</sub>-D18-Cl<sub>0.2</sub>-TCI: BTP-eC9</b>      | 102.37                                     | 59.87                                         | 28.842                              | 0.244                               | 29.086                                      | (-)          | 1.11                      |
| <b>PM6-Cl<sub>0.8-b</sub>-D18-Cl<sub>0.2</sub>-TCI: BTP-eC9</b>      | 102.65                                     | 59.06                                         | 29.467                              | 0.186                               | 29.654                                      | (-)          | 1.16                      |
| <b>PM6-Cl<sub>0.5-b</sub>-D18-Cl<sub>0.5</sub>-TCI: BTP-eC9</b>      | 102.03                                     | 59.97                                         | 28.692                              | 0.284                               | 28.976                                      | (-)          | 1.10                      |
| <b>PM6-Cl<sub>0.2-b</sub>-D18-Cl<sub>0.8</sub>-TCI: BTP-eC9</b>      | 101.76                                     | 60.00                                         | 28.608                              | 0.315                               | 28.923                                      | (-)          | 1.25                      |
| <b>PM6-Cl<sub>0.8-b</sub>-D18-Cl<sub>0.2</sub>-BTB: BTP-eC9</b>      | 102.93                                     | 60.62                                         | 28.456                              | 0.220                               | 28.676                                      | (-)          | 1.30                      |
| <b>PM6-Cl<sub>0.8-b</sub>-D18-Cl<sub>0.2</sub>-TCI: PM6: BTP-eC9</b> | 102.53                                     | 58.80                                         | 29.616                              | 0.188                               | 29.804                                      | (-)          | 1.18                      |
| <b>BTP-eC9<sup>[44]</sup></b>                                        | 96.9                                       | 34.3                                          | 43.919                              | 0.023                               | 43.942                                      | (-)          | (-)                       |

\*(a) The contact angle between H<sub>2</sub>O and corresponding film;

(b) The contact angle between CH<sub>2</sub>I<sub>2</sub> and corresponding films;

(c)  $\chi = (\sqrt{\gamma_a} - \sqrt{\gamma_d})^2$ ,  $\gamma_A$  and  $\gamma_D$  represent the surface tension of the acceptor and donor, respectively.

The contact angle test obtains the compatibility of the material to the receptor, and the contact angle of the material is measured using water and ethylene glycol as non-polar solvents. The surface tension of different components is calculated by the following formula:

H<sub>2</sub>O: London dispersion ( $\gamma^d$ ) = 21.80 mN m<sup>-1</sup>, polar ( $\gamma^p$ ) = 51.0 mN m<sup>-1</sup>.

CH<sub>2</sub>I<sub>2</sub>: London dispersion ( $\gamma^d$ ) = 48.50 mN m<sup>-1</sup>, polar ( $\gamma^p$ ) = 2.30 mN m<sup>-1</sup>.

(d) The value of **Ra** is calculated based on the characterization of AFM height figures in **Figure S22**, using the analysis software **Nano Scope Analysis 1.5**.

**Table S9.** Detailed GIWAXS characterization results of MCDs.

| Active layer                                                         | $\pi$ - $\pi$ stacking (Out-Of-Plane (OOP)) |                                   |                                       |                                 | Lamellar stacking (In-Plane (IP))  |                                          |                                 |                           |
|----------------------------------------------------------------------|---------------------------------------------|-----------------------------------|---------------------------------------|---------------------------------|------------------------------------|------------------------------------------|---------------------------------|---------------------------|
|                                                                      | $q_z^{(a)}$<br>[ $\text{\AA}$ ]             | $d_\pi^{(b)}$<br>[ $\text{\AA}$ ] | $FWHM^{(c)}$<br>[ $\text{\AA}^{-1}$ ] | $CCL^{(d)}$<br>[ $\text{\AA}$ ] | $q_{xy}^{(e)}$<br>[ $\text{\AA}$ ] | $d_{lamellar}^{(f)}$<br>[ $\text{\AA}$ ] | $FWHM$<br>[ $\text{\AA}^{-1}$ ] | $CCL$<br>[ $\text{\AA}$ ] |
| <b>PM6</b>                                                           | 1.64                                        | 3.831                             | 0.289                                 | 19.567                          | 0.297                              | 21.156                                   | 0.0869                          | 65.073                    |
| <b>PM6-Cl<sub>0.5</sub>-b-D18-Cl<sub>0.5</sub>-TCI</b>               | 1.66                                        | 3.785                             | 0.297                                 | 19.040                          | 0.294                              | 21.371                                   | 0.0852                          | 66.372                    |
| <b>PM6-Cl<sub>0.2</sub>-b-D18-Cl<sub>0.8</sub>-TCI</b>               | 1.67                                        | 3.762                             | 0.318                                 | 17.783                          | 0.304                              | 20.668                                   | 0.0946                          | 59.777                    |
| <b>PM6-Cl<sub>0.8</sub>-b-D18-Cl<sub>0.2</sub>-TCI: PM6</b>          | 1.65                                        | 3.808                             | 0.270                                 | 20.944                          | 0.279                              | 22.520                                   | 0.0802                          | 70.510                    |
| <b>PM6: BTP-eC9</b>                                                  | 1.70                                        | 3.696                             | 0.279                                 | 20.268                          | 0.303                              | 20.737                                   | 0.0777                          | 72.778                    |
| <b>PM6-Cl<sub>0.5</sub>-b-D18-Cl<sub>0.5</sub>-TCI: BTP-eC9</b>      | 1.72                                        | 3.653                             | 0.285                                 | 19.842                          | 0.320                              | 19.635                                   | 0.0815                          | 69.385                    |
| <b>PM6-Cl<sub>0.2</sub>-b-D18-Cl<sub>0.8</sub>-TCI: BTP-eC9</b>      | 1.73                                        | 3.632                             | 0.289                                 | 19.567                          | 0.330                              | 19.040                                   | 0.0888                          | 63.681                    |
| <b>PM6-Cl<sub>0.8</sub>-b-D18-Cl<sub>0.2</sub>-TCI: PM6: BTP-eC9</b> | 1.71                                        | 3.674                             | 0.260                                 | 21.749                          | 0.296                              | 21.227                                   | 0.0754                          | 74.998                    |

\*(a) (010)  $\pi$ - $\pi$  stacking diffraction peaks from the line cuts in the OOP direction;

(b)  $\pi$ - $\pi$  stacking distance;

(c) Full width at half maxima;

(d) Conjugated crystal length;

(e) (100) Lamellar stacking diffraction peaks from the line cuts in the IP direction;

(f) Lamellar stacking distance.

**Table S10.** Detailed stability parameters of MCDs.

| <b>MCD</b>                                                    | <b><math>T_{d5\%}^{(a)}</math><br/>[°C]</b> | <b><math>T_{DTG, m}^{(b)}</math><br/>[°C]</b> | <b><math>DTG_m^{(c)}</math><br/>[% min<sup>-1</sup>]</b> | <b><math>T_g^{(d)}</math><br/>[°C]</b> |
|---------------------------------------------------------------|---------------------------------------------|-----------------------------------------------|----------------------------------------------------------|----------------------------------------|
| <b>PM6</b>                                                    | 434                                         | 461                                           | -5.79                                                    | 421-498                                |
| <b>PM6-Cl<sub>0.8</sub>-<i>r</i>-D18-Cl<sub>0.2</sub>-TCI</b> | 425                                         | 444                                           | -6.23                                                    | 402-487                                |
| <b>PM6-Cl<sub>0.8</sub>-<i>b</i>-D18-Cl<sub>0.2</sub>-TCI</b> | 432                                         | 453                                           | -6.19                                                    | 428-480                                |
| <b>PM6-Cl<sub>0.5</sub>-<i>b</i>-D18-Cl<sub>0.5</sub>-TCI</b> | 427                                         | 451                                           | -6.33                                                    | 420-491                                |
| <b>PM6-Cl<sub>0.2</sub>-<i>b</i>-D18-Cl<sub>0.8</sub>-TCI</b> | 428                                         | 459                                           | -6.61                                                    | 415-490                                |
| <b>PM6-Cl<sub>0.8</sub>-<i>b</i>-D18-Cl<sub>0.2</sub>-BTB</b> | 431                                         | 450                                           | -6.31                                                    | 411-488                                |

\*(a) The temperature at which the donor material reaches a 5% mass loss;

(b) The temperature at which the donor material reaches its fastest decomposition rate;

(c) The fastest decomposition rate that donor material can achieve;

(d) The range of donor materials in glass transition temperature.



**Table S11.** Detailed characterization of mechanical properties for pristine and blend films.

| Active layer                                                          | AFM PFQNM                |                           | Film on Water                  |                                         |
|-----------------------------------------------------------------------|--------------------------|---------------------------|--------------------------------|-----------------------------------------|
|                                                                       | Elastic modulus<br>[GPa] | Crack-onset strain<br>[%] | Stress <sup>(a)</sup><br>[MPa] | Elastic modulus <sup>(b)</sup><br>[GPa] |
| PM6                                                                   | 1.73                     | 8.19                      | 4.00                           | 0.66                                    |
| PM6-Cl <sub>0.8-r</sub> -D18-Cl <sub>0.2</sub> -<br>TCI               | 1.52                     | 15.19                     | 34.66                          | 4.08                                    |
| PM6-Cl <sub>0.8-b</sub> -D18-Cl <sub>0.2</sub> -<br>TCI               | 2.21                     | 32.02                     | 36.80                          | 3.38                                    |
| PM6-Cl <sub>0.5-b</sub> -D18-Cl <sub>0.5</sub> -<br>TCI               | 2.35                     | 22.14                     | 52.39                          | 4.65                                    |
| PM6-Cl <sub>0.2-b</sub> -D18-Cl <sub>0.8</sub> -<br>TCI               | 1.43                     | 16.99                     | 18.36                          | 4.19                                    |
| PM6-Cl <sub>0.8-b</sub> -D18-Cl <sub>0.2</sub> -<br>BTB               | 1.87                     | 40.29                     | 57.79                          | 3.59                                    |
| PM6-Cl <sub>0.8-b</sub> -D18-Cl <sub>0.2</sub> -<br>TCI: PM6          | (-)                      | 24.14                     | 4.90                           | 0.91                                    |
| PM6: BTP-eC9                                                          | 1.67                     | 4.60                      | 7.9                            | 3.58                                    |
| PM6-Cl <sub>0.8-r</sub> -D18-Cl <sub>0.2</sub> -<br>TCI: BTP-eC9      | 2.41                     | 10.11                     | 43.78                          | 6.85                                    |
| PM6-Cl <sub>0.8-b</sub> -D18-Cl <sub>0.2</sub> -<br>TCI: BTP-eC9      | 1.74                     | 22.58                     | 54.31                          | 4.08                                    |
| PM6-Cl <sub>0.5-b</sub> -D18-Cl <sub>0.5</sub> -<br>TCI: BTP-eC9      | 1.76                     | 17.75                     | 54.31                          | 6.11                                    |
| PM6-Cl <sub>0.2-b</sub> -D18-Cl <sub>0.8</sub> -<br>TCI: BTP-eC9      | 2.38                     | 16.71                     | 43.24                          | 4.69                                    |
| PM6-Cl <sub>0.8-b</sub> -D18-Cl <sub>0.2</sub> -<br>BTB: BTP-eC9      | 1.46                     | 25.38                     | 43.79                          | 4.07                                    |
| PM6-Cl <sub>0.8-b</sub> -D18-Cl <sub>0.2</sub> -<br>TCI: PM6: BTP-eC9 | (-)                      | 11.03                     | 18.33                          | 3.73                                    |
| PM6-Cl <sub>0.8-b</sub> -D18-Cl <sub>0.2</sub> -<br>BTB: PM6: BTP-eC9 | (-)                      | 14.99                     | 37.66                          | 4.47                                    |
| D18: BTP-eC9                                                          | (-)                      | 4.95                      | 5.13                           | 3.85                                    |
| D18: PM6-Cl <sub>0.8-b</sub> -D18-<br>Cl <sub>0.2</sub> -TCI: BTP-eC9 | (-)                      | 14.49                     | 35.87                          | 4.86                                    |
| D18: PM6-Cl <sub>0.8-b</sub> -D18-<br>Cl <sub>0.2</sub> -BTB: BTP-eC9 | (-)                      | 18.84                     | 61.75                          | 4.99                                    |
| PM6-Cl <sub>0.8-b</sub> -D18-Cl <sub>0.2</sub> -<br>TCI: PY-IT        | (-)                      | 29.48                     | 71.24                          | 5.26                                    |
| PM6-Cl <sub>0.8-b</sub> -D18-Cl <sub>0.2</sub> -<br>BTB: PY-IT        | (-)                      | 36.52                     | 77.45                          | 5.53                                    |

\*<sup>(a)</sup> The highest stress value achieved in corresponding films.

(b) Gradient of slope in MCD elastic deformation region.

**Table S12.** Detailed photoelectric parameters for flexible MCD-based OSCs.

| MCD                                                         | Acceptor | D/A <sup>(a)</sup> | $V_{oc}$<br>[V] | $J_{sc}$<br>[mA cm <sup>-2</sup> ] | FF<br>[%] | PCE<br>[%] |
|-------------------------------------------------------------|----------|--------------------|-----------------|------------------------------------|-----------|------------|
| PM6-Cl <sub>0.8</sub> -b-D18-Cl <sub>0.2</sub> -TCl         | BTP-eC9  | 1: 1.2             | 0.845           | 27.02                              | 75.40     | 17.21      |
| PM6-Cl <sub>0.8</sub> -b-D18-Cl <sub>0.2</sub> -BTB         | BTP-eC9  | 1: 1.2             | 0.833           | 26.53                              | 64.99     | 14.36      |
| PM6-Cl <sub>0.8</sub> -b-D18-Cl <sub>0.2</sub> -TCl<br>:PM6 | BTP-eC9  | 1: 1.2             | 0.849           | 27.84                              | 76.29     | 18.03      |

\*<sup>(a)</sup> The total concentration of the donor and NFA-SMA acceptor (BTP-eC9) remained identical with a best ratio of 1:1.2.

## References

- [1] J. W. Lee, C. Sun, S. Lee, D. J. Kim, E. S. Oh, T. N. L. Phan, T. H. Q. Nguyen, S. Seo, Z. Tan, M. J. Lee, J. Y. Lee, X. Bao, T. S. Kim, C. Lee, Y. H. Kim, B. J. Kim, *Nano Energy* **2024**, 125: 109541.
- [2] J. W. Lee, C. Sun, S. W. Lee, G. U. Kim, S. Li, C. Wang, T. S. Kim, Y. H. Kim, B. J. Kim, *Energy Environ. Sci.* **2022**, 15, 4672.
- [3] J. W. Lee, S. W. Lee, J. Kim, Y. H. Ha, C. Sun, T. N. L. Phan, S. Lee, C. Wang, T. S. Kim, Y. H. Kim, B. J. Kim, *J. Mater. Chem. A* **2022**, 10, 20312.
- [4] J. He, D. Zhang, J. Liu, I. Yang, Y. Gao, M. Shao, *ACS Appl. Mater. Interfaces* **2024**, 16, 17, 22294.
- [5] C. Sun, J. W. Lee, Z. Tan, T. N. L. Phan, D. Han, H. G. Lee, S. Lee, S. K. Kwon, B. J. Kim, Y. H. Kim, *Adv. Energy Mater.* **2023**, 13, 2301283.
- [6] S. Seo, J. W. Lee, D. J. Kim, D. Lee, T. N. L. Phan, J. Park, Z. Tan, S. Cho, T. S. Kim, B. J. Kim, *Adv. Mater.* **2023**, 35, 2300230.
- [7] J. W. Lee, S. Seo, S. W. Lee, G. U. Kim, S. Han, T. N. L. Phan, S. Lee, S. Li, T. S. Kim, J. Y. Lee, B. J. Kim, *Adv. Mater.* **2022**, 34, 2207544.
- [8] J. W. Lee, C. Lim, S. W. Lee, Y. Jeon, S. Lee, T. S. Kim, J. Y. Lee, B. J. Kim, *Adv. Energy Mater.* **2022**, 12, 2202224.
- [9] J. W. Lee, C. Sun, J. Lee, D. J. Kim, W. J. Kang, S. Lee, D. Kim, J. Park, T. N. L. Phan, Z. Tan, F. S. Kim, J. Y. Lee, X. Bao, T. S. Kim, Y. H. Kim, B. J. Kim, *Adv. Energy Mater.* **2024**, 14, 2303872.

- [10] J. W. Lee, H. G. Lee, E. S. Oh, S. W. Lee, T. N. L. Phan, S. Li, T. S. Kim, B. J. Kim, *Joule*, **2024**, 8, 204.
- [11] Z. Genene, J. W. Lee, S. W. Lee, Q. Chen, Z. Tan, B. A. Abdulahi, D. Yu, T. S. Kim, B. J. Kim, E. Wang, *Adv. Mater.* **2022**, 34, 2107361.
- [12] C. Lin, R. Peng, W. Song, Z. Chen, T. Feng, D. Sun, Y. Bai, Z. Ge, *Angew. Chem., Int. Ed.* **2024**, 63, e202407040.
- [13] W. Feng, Z. Lin, J. Cui, W. Lv, W. Wang, Q. Ling, *Sol. Energy Mater. Sol. Cells* **2019**, 200, 109982.
- [14] G. Zhang, Y. Fu, L. Qiu, Z. Xie, *Polymer* **2012**, 53, 4407.
- [15] M. Wu, L. Shi, Y. Hu, L. Chen, T. Hu, Y. Zhang, Z. Yuan, Y. Chen, *Chin. Chem. Lett.* **2019**, 30, 1161.
- [16] Y. Huang, M. Zhang, H. Chen, F. Wu, Z. Cao, L. Zhang, S. Tan, *J. Mater. Chem. A* **2014**, 2, 5218.
- [17] M. C. Yuan, M. Y. Chiu, C. M. Chiang, K. H. Wei, *Macromolecules* **2010**, 43, 6270.
- [18] P. Shen, H. Bin, L. Xiao, Y. Li, *Macromolecules* **2013**, 46, 9575.
- [19] H. Jung, G. Yu, S. Jang, I. Hwang, B. Kim, B. S. Kim, Y. Lee, *Org. Electron.* **2020**, 86, 105929.
- [20] Z. Li, X. Wang, J. Ren, G. Gan, C. Liu, Q. Sun, H. Wang, Y. Hao, *J. Mater. Chem. C* **2018**, 6, 4555.
- [21] D. Kotowski, S. Luzzati, G. Bianchi, A. Calabrese, A. Pellegrino, R. Po, G. Schimperia, A. Tacca, *J. Mater. Chem. A* **2013**, 1, 10736.
- [22] X. Xu, G. Zhang, Y. Zhao, J. Liu, Y. Li, Q. Peng, *Chin. J. Polym. Sci.* **2017**, 35, 249.
- [23] S. M. Bang, S. Kang, Y. S. Lee, B. Lim, H. Heo, J. Lee, Y. Lee, S. Na, *RSC Adv.* **2017**, 7, 1975.
- [24] S. H. Kang, T. Kumari, S. M. Lee, M. Jeong, C. Yang, *Adv. Energy Mater.* **2017**, 7, 1700349.
- [25] K. Li, Z. Hu, Z. Zeng, Z. Huang, W. Zhong, L. Ying, F. Huang, *Org. Electron.* **2018**, 57, 317.
- [26] M. L. Keshtov, S. A. Kuklin, I. O. Konstantinov, I. E. Ostapov, D. Y. Godovsky, E. E. Makhaeva, Z. Xie, G. D. Sharma, *J. Polym. Sci., Part A: Polym. Chem.* **2019**, 57, 1478.
- [27] T. Kim, J. Y. Lee, J. Heo, B. Lim, J. Y. Kim, *Polym. Chem.* **2018**, 9, 1216.
- [28] M. L. Keshtov, S. A. Kuklin, I. O. Konstantinov, I. E. Ostapov, E. E. Makhaeva,

- A. Y. Nikolaev, Z. Xie, Y. Zou, G. D. Sharma, *New J. Chem.* **2019**, 43, 5325.
- [29] M. H. Hoang, G. E. Park, D. L. Phan, T. T. Ngo, T. V. Nguyen, S. H. Park, M. J. Cho, D. H. Choi, *J. Polym. Sci., Part A: Polym. Chem.* **2018**, 56, 1528.
- [30] X. Wang, K. Dou, B. Shahid, Z. Liu, Y. Li, M. Sun, N. Zheng, X. Bao, R. Yang, *Chem. Mater.* **2019**, 31, 6163.
- [31] X. Jing, Y. Zhong, Q. Wang, F. Li, X. Wang, K. Zhang, M. Sun, *Polym. Int.* **2021**, 70, 443.
- [32] D. H. Kim, T. T. T. Bui, S. Rasool, C. E. Song, H. K. Lee, S. K. Lee, J. C. Lee, W. W. So, W. S. Shin, *ACS Appl. Mater. Interfaces* **2018**, 11, 2189.
- [33] T. Dai, A. Tang, Z. He, M. Du, P. Lei, Q. Zeng, Z. Wang, Y. Wang, S. Lu, Y. Zhong, E. Zhou, *Energy Environ. Sci.* **2023**, 16, 2199.
- [34] J. Ji, J. Xie, J. Tang, K. Zheng, Z. Liang, *Sol. RRL* **2021**, 5, 2100142.
- [35] X. Huang, L. Zhang, Y. Cheng, J. Oh, C. Li, B. Huang, L. Zhao, J. Deng, Y. Zhang, Z. Liu, F. Wu, X. Hu, C. Yang, L. Chen, Y. Chen, *Adv. Funct. Mater.* **2022**, 32, 2108634.
- [36] M. Pu, H. Chen, P. Chao, Y. Zhu, N. Zheng, H. Lai, T. Zhao, F. He, *ACS Appl. Polym. Mater.* **2020**, 3, 14.
- [37] H. W. Cho, S. Y. Jeong, Z. Wu, H. Lim, W. W. Park, W. Lee, J. V. S. Krishna, O. H. Kwon, J. Y. Kim, H. Y. Woo, *J. Mater. Chem. A* **2023**, 11, 7053.
- [38] J. Wu, G. Li, J. Fang, X. Guo, L. Zhu, B. Guo, Y. Wang, G. Zhang, L. Arunagiri, F. Liu, H. Yan, M. Zhang, Y. Li, *Nat. Commun.* **2020**, 11, 1.
- [39] X. Guo, Q. Fan, J. Wu, G. Li, Z. Peng, W. Su, J. Lin, L. Hou, Y. Qin, H. Ade, L. Ye, M. Zhang, Y. Li, *Angew. Chem.* **2021**, 133, 2352.
- [40] Y. Zhang, J. Deng, Q. Mao, S. Y. Jeong, X. Huang, L. Zhang, B. Lee, B. Huang, H. Y. Woo, C. Yang, J. Xu, F. Wu, Q. Y. Cao, L. Chen, *Chem. Eng. J.* **2023**, 457, 141343.
- [41] H. R. Bai, Q. An, H. F. Zhi, M. Jiang, A. Mahmood, L. Yan, M. Q. Liu, Y. Q. Liu, Y. Wang, J. L. Wang, *ACS Energy Lett.* **2022**, 7, 3045.
- [42] X. Chen, C. Liao, M. Deng, X. Xu, L. Yu, R. Li, Q. Peng, *Chem. Eng. J.* **2023**, 451, 139046.
- [43] B. Zheng, Y. Yue, J. Ni, R. Sun, J. Min, J. Wang, L. Jiang, L. Huo, *Sci. China: Chem.* **2022**, 65, 964.
- [44] J. Wang, M. Zhang, J. Lin, Z. Zheng, L. Zhu, P. Bi, H. Liang, X. Guo, J. Wu, Y. Wang, L. Yu, J. Li, J. Lv, X. Liu, F. Liu, J. Hou, Y. Li, *Energy Environ. Sci.* **2022**, 15, 1585.
